# Supplementary material
Source: PubMed Central journal article supplement (PMC8753371)
Supplement: mmc1.pdf [file mmc1.pdf]

YMTHE, Volume 30

## Supplemental Information

### Dual-AAV delivering split prime editor system for *in vivo* genome editing

Shengyao Zhi, Yuxi Chen, Guanglan Wu, Jinkun Wen, Jinni Wu, Qianyi Liu, Yang Li, Rui Kang, Sihui Hu, Jiahui Wang, Puping Liang, and Junjiu Huang

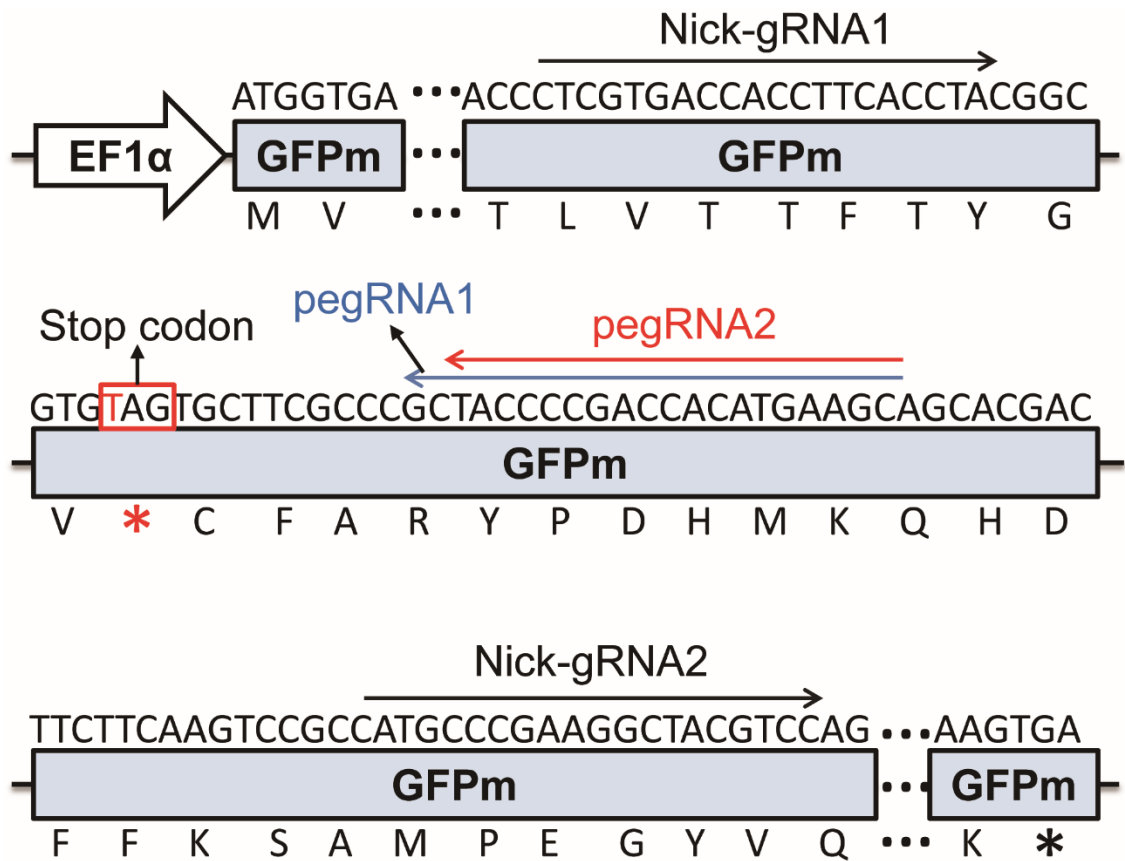

**Figure S1. Schematics of GFP mutated (GFPm) reporter.** Two pegRNAs were designed both with a PBS length of 13 nt and an RT template length of 19 nt downstream the mutation site. And two nick-gRNAs were designed to nick the non-edited strand.

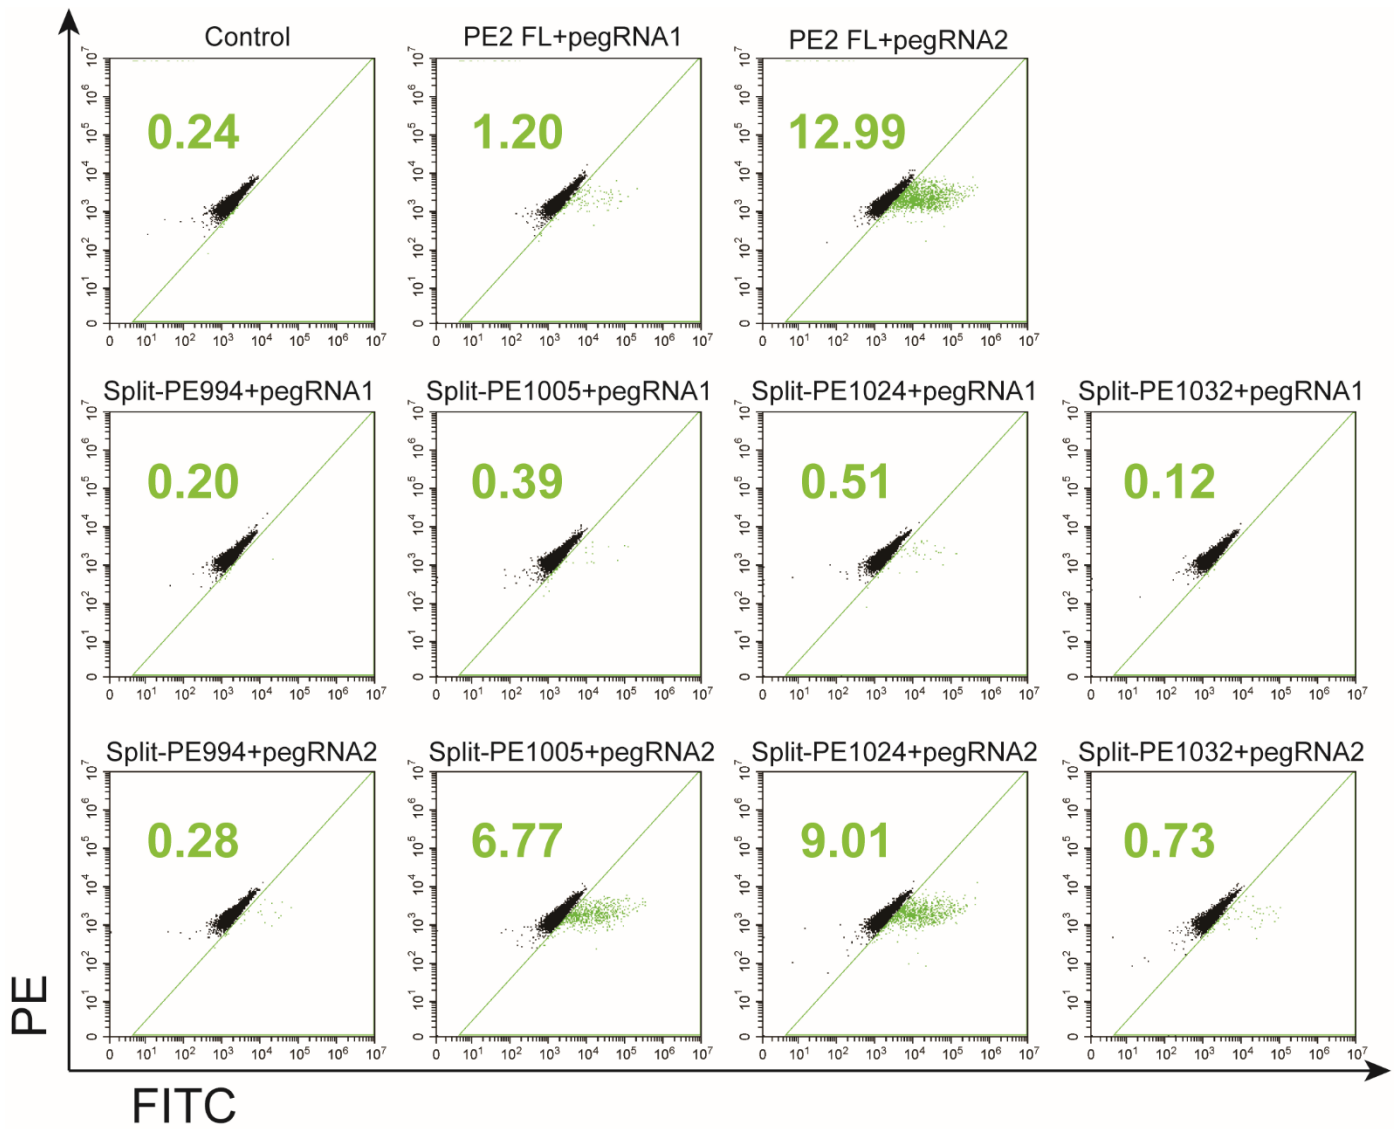

**Figure S2. Inducible GFP expression with different split-PE2 pairs and pegRNAs in the GFPm reporter cell.** The GFP signal would be detected by a flow cytometer when the TAG codon was corrected to CAG codon after split-PEs treatment. The signals of PE and FITC channels were collected to eliminate auto-fluorescence. The percentages of GFP positive cells were in green. Control, cells transfected with full-length PE2 but not pegRNA. PE2 FL refers to full-length PE2. Split-PE994, split-PE1005, split-PE1024, and split-PE1032 were split at 994-995, 1005-1006, 1024-1025, and 1032-1033, respectively.

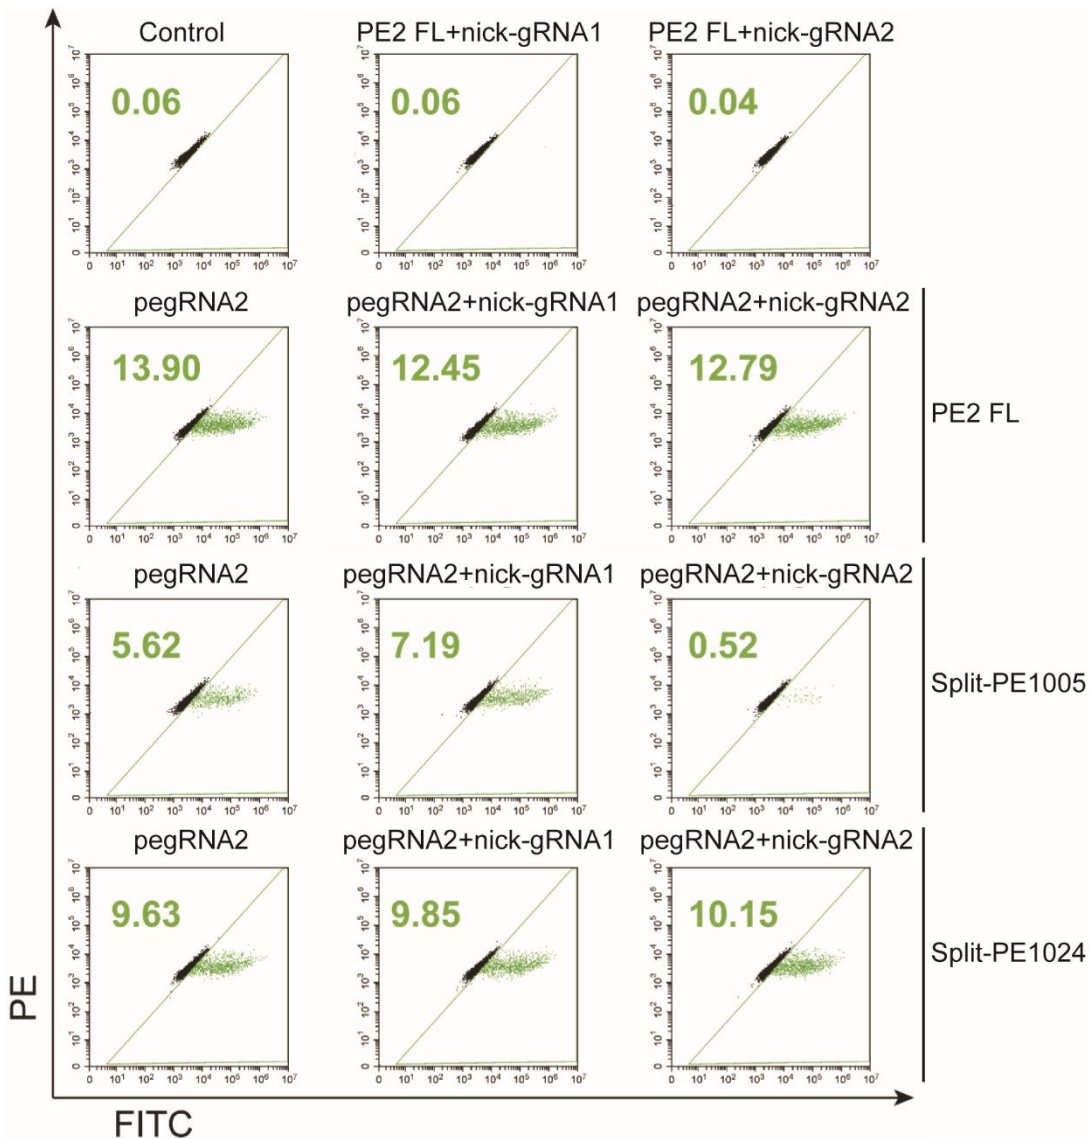

**Figure S3. Inducible GFP expression with varying split-PE2 pairs, pegRNA2, and nick-gRNAs in GFPm reporter.** The GFP signal would be detected by a flow cytometer when the stop codon (TAG) has been corrected to wild-type Gln (CAG) codon after split-PEs treatment. PE and FITC channels were collected to eliminated auto-fluorescence. Green color labeling the percentages of GFP positive cells. Control, cells transfected with full-length PE2 but not pegRNA. PE2 FL refers to full-length PE2. Split-PE1005 and split-PE1024 were split at 1005-1006 and 1024-1025, respectively.

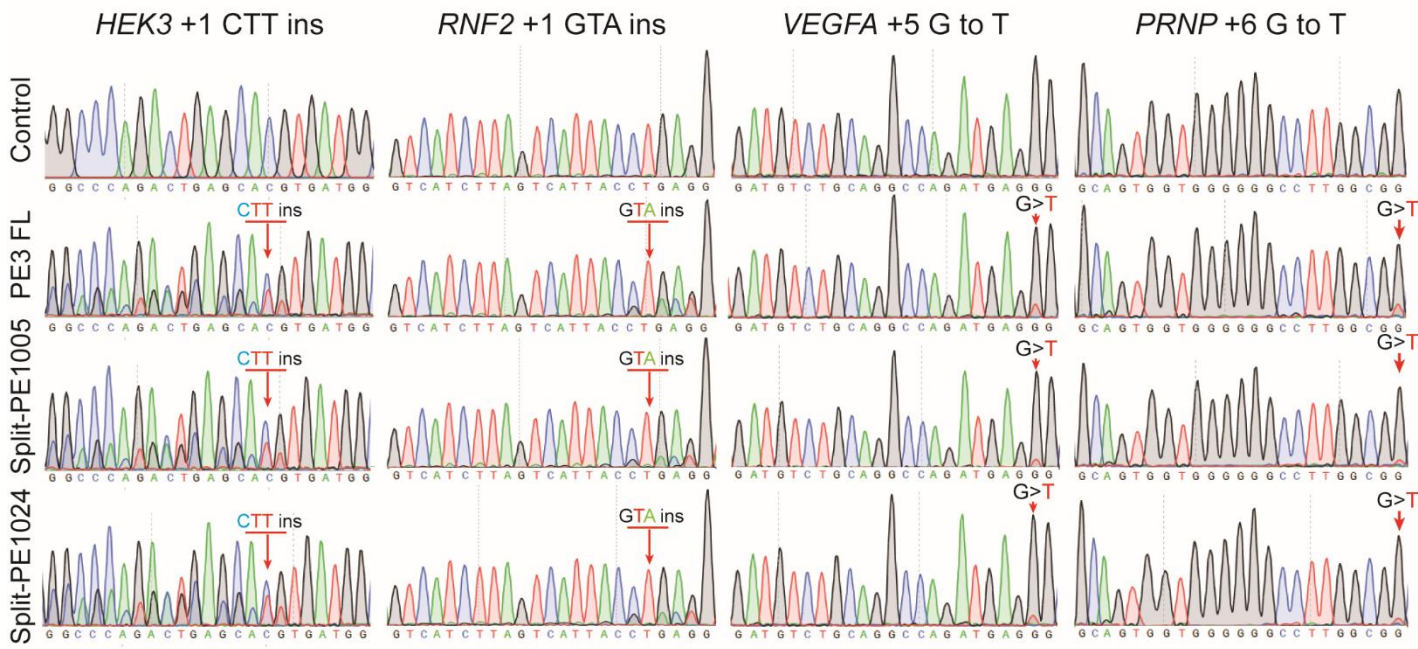

**Figure S4. Prime editing of endogenous sites in HEK293T cells by split-PEs.** Sanger sequencing data analysis of insertion and single-nucleotide transversion prime editing at four endogenous sites targeted by split-PEs through plasmid transfection. The red arrow indicates the editing site. Control, HEK293T cells transfected with full-length PE2 but not pegRNA. PE3 FL, HEK293T cells transfected with full-length PE2, pegRNA and nick-gRNA. Split-PE1005 and split-PE1024 were split at 1005-1006 and 1024-1025, respectively.

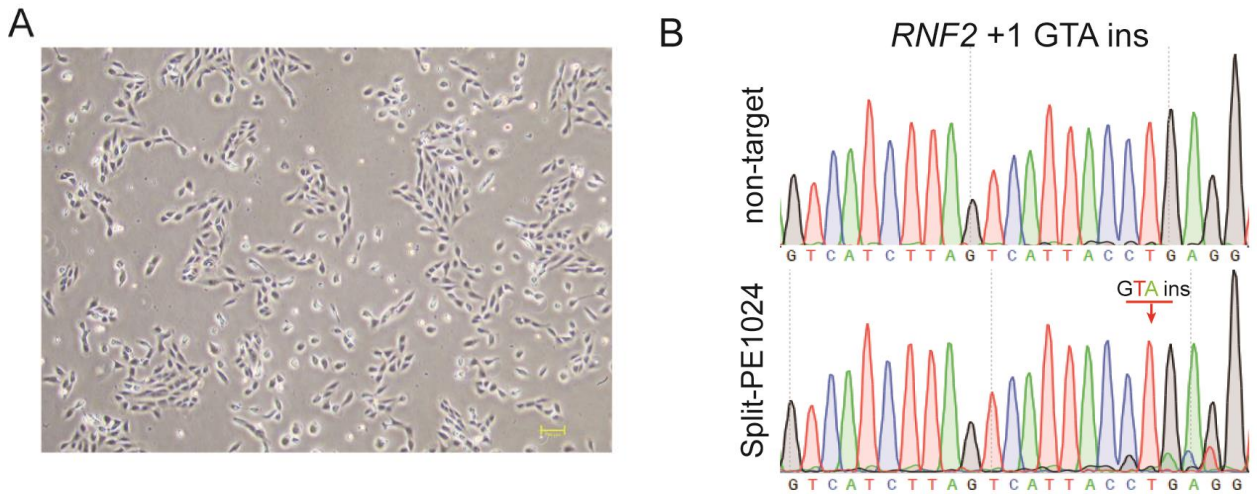

**Figure S5. Prime editing of endogenous site in ARPE-19 cells by split-PE1024.** (A) Morphology of ARPE-19 cells. Scale bars indicated 100  $\mu\text{m}$ . (B) Example of Sanger sequencing to detect editing at *RNF2* for +1 GTA insertion targeted by split-PE1024 in ARPE-19 cells. The red arrow indicates the edited site.

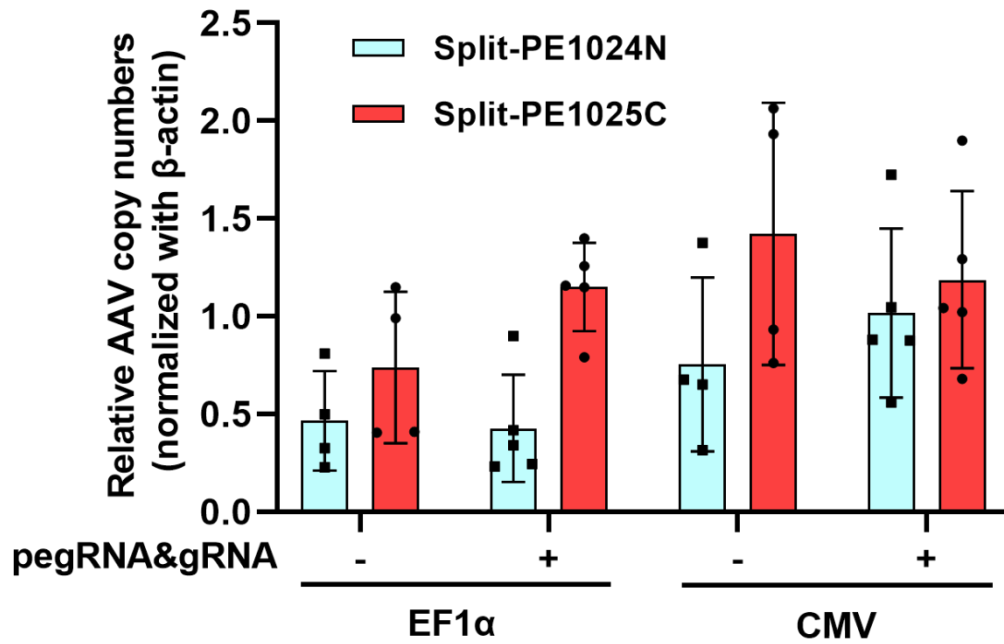

**Figure S6. Quantitative PCR analysis of relative AAV copy numbers in mice retina.** Blue columns refer to the N-terminal half of PE (Split-PE1024N), whereas red columns refer to the C-terminal half of PE (Split-PE1025C). Data were normalized using  $\beta$ -actin. Values and error bars represent the mean  $\pm$  S.D. of more than three independent mice eyes.

*Dnmt1* On target C G G G C T G G A G C T G T T C G C G C T G G

*Dnmt1* Off target1 C G G C C T G C A G C T G A G C G C G C T G G

*Dnmt1* Off target2 C G G G G T C G A G C A G T G C G C G C G G G

*Dnmt1* Off target3 C G G G C T G G T G G T T G T C G C G C G G G

*Dnmt1* Off target4 G C A G C T G C A C C T G T T C G C G C T G G

*Dnmt1* Off target5 A C G C C T G G A G G T G G T C G C G C T G G

*Dnmt1* Off target6 G G C A C T G G G G C T G T C G C G C G G G

*Dnmt1* Off target7 G G A C C T G G A G C T G C G C G C G C G G

*Dnmt1* Off target8 G A G G C T G G A G C T G T T G G C G C A G G

### mouse, *Dnmt1* Off-target

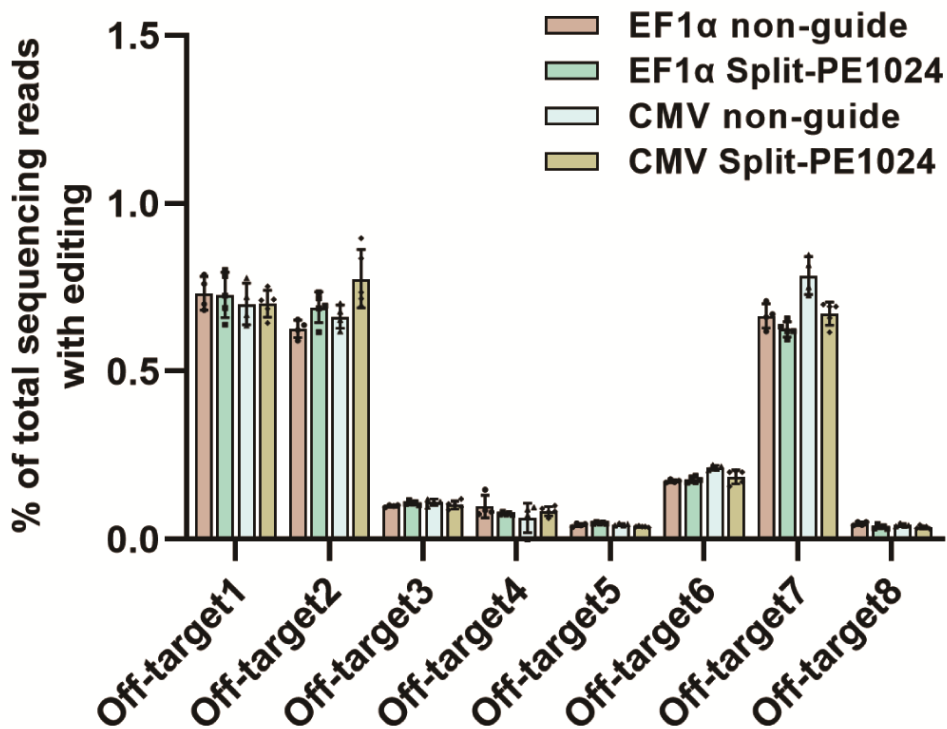

**Figure S7. Off-target analysis of *Dnmt1* targeted by dual-AAV delivered split-PE1024 in mouse retina.** All types of editing, including all types of indels as well as base substitutions, were analyzed by CRISPResso2. Retinas injected with split-PE1024 and non-targeting pegRNA were regarded as negative control. Values and error bars represent the mean  $\pm$  S.D. of more than three independent mice eyes.



Supplementary Table S1. List of pegRNAs, gRNAs, and primers.

| Sequences of pegRNAs       |                             |                               |                 |                         |
|----------------------------|-----------------------------|-------------------------------|-----------------|-------------------------|
| pegRNA                     | spacer sequence             | 3'extension sequence          | PBS length (nt) | RT template length (nt) |
| GFPm_pegRNA1               | cttcatgtggcgggtagc          | gtgtagtgctcggcctaccccaccacat  | 13              | 19                      |
| GFPm_pegRNA2               | gcttcatgtggcgggtag          | tgtagtgctcggcctaccccaccacatg  | 13              | 19                      |
| <i>RNF2</i> _+1GTA_ins     | gtcatcttagcattacctg         | aacgaacacctcagtagtaataactaatg | 15              | 17                      |
| <i>VEGFA</i> _+5GtoT       | gatgtctgcaggccagatga        | atctggagcactcatctggcctgcaga   | 13              | 14                      |
| <i>HEK3</i> _+1CTT_ins     | ggcccagactgagcacgtga        | tctgcatcaaaagcgtgctcagctctg   | 13              | 13                      |
| <i>PRNP</i> _+6GtoT        | gcagtggggtggggccttgg        | atgtagtcgccaaggccccccacc      | 12              | 12                      |
| <i>DNMT1</i> _+5GtoT       | cgggctggagctgttcgcgc        | aagatgcaagcgcgaacagctccag     | 13              | 12                      |
|                            |                             |                               |                 |                         |
| Sequences of gRNAs         |                             |                               |                 |                         |
| Nick-gRNA                  | spacer sequence             |                               |                 |                         |
| GFPm-nick-gRNA1            | ctcgtgaccacettcaccta        |                               |                 |                         |
| GFPm-nick-gRNA2            | catgcccgaaggctacgtcc        |                               |                 |                         |
| <i>RNF2</i> -nick-gRNA     | tcaaccattaagcaaaacat        |                               |                 |                         |
| <i>VEGFA</i> -nick-gRNA    | ccctctgacaatgtgccatc        |                               |                 |                         |
| <i>HEK3</i> -nick-gRNA     | gtcaaccagtatcccgggtgc       |                               |                 |                         |
| <i>PRNP</i> -nick-gRNA     | gcatgttttcacgatagtaa        |                               |                 |                         |
| <i>DNMT1</i> -nick-gRNA    | ccgcgcgcgcgaaaaagccg        |                               |                 |                         |
|                            |                             |                               |                 |                         |
| Sequences of primers       |                             |                               |                 |                         |
| Description                | Forward                     | Reverse                       |                 |                         |
| <i>RNF2</i> -DS            | aacggaactcaaccattaagca      | ccaacatacagaagtcaggaatgc      |                 |                         |
| <i>VEGFA</i> -DS           | aaacttggtgccaattctctcc      | tatttgggactggagttgcttca       |                 |                         |
| <i>HEK3</i> -DS            | cgcccatgcaattagtctatttct    | actgtcaaccagtatcccg           |                 |                         |
| <i>PRNP</i> -DS            | aacaagccgagtaagcctaaaac     | gtaacggtgcatgttttcacgat       |                 |                         |
| <i>DNMT1</i> -DS           | gccccctccaattggttctc        | ggagatacccccaatatatgctt       |                 |                         |
| <i>RNF2</i> -OT1           | aaattatcatatgtgaaagaagccagg | cctgccaatgaaatccaaatgaaa      |                 |                         |
| <i>RNF2</i> -OT2           | atgtggttaaaatccactgttctaa   | caatagtgatcagtaaagtaagaaatc   |                 |                         |
| <i>HEK3</i> -OT1           | gtccaaaggccaagaacct         | gagagggaacagaggggct           |                 |                         |
| <i>HEK3</i> -OT2           | tccccgttgacctggagaa         | actgtacttgccctgacca           |                 |                         |
| <i>HEK3</i> -OT3           | tgagatgtgggcagaaagg         | tggtgttgacaggagaa             |                 |                         |
| <i>HEK3</i> -OT4           | gctcatcttaactgctcagcc       | cctagcacttggagaggtcg          |                 |                         |
| <i>VEGFA</i> -OT1          | gaggaggccaagagctagcttgac    | tagaggctgaaagtctgagatcagagtg  |                 |                         |
| <i>VEGFA</i> -OT2          | cctttgtttgtgttttggctgtagg   | aataggtggtgatcgctgcca         |                 |                         |
| <i>VEGFA</i> -OT3          | ttttgtaactcgagagcccaggtgt   | cagctgtcttccccactctactctga    |                 |                         |
| <i>VEGFA</i> -OT4          | ggaaaagaggagctctttggaagaca  | gcatccccattcatccagcagtg       |                 |                         |
| AAV-PE-detect              | tcttctcgtggaagaggataa       | ctcgaacagctggtgttaggtc        |                 |                         |
| SplitPE-N-qPCR             | accagagcaagaacggctac        | tggtcagcttcacgagcagt          |                 |                         |
| SplitPE-C-qPCR             | gacaaaagtgtctgccctca        | ctggtgtacctcttccggtc          |                 |                         |
| mouse- $\beta$ -actin-qPCR | gagagctcaccattcaccatctt     | gggcccggactcatcgtact          |                 |                         |
| mouse- $\beta$ -actin      | gtccctcaccctccaaaag         | gctgctcaaacctcaacce           |                 |                         |
| <i>Dnmt1</i> -Off-target1  | eggaggaggcggcgcgcgcc        | gtacagcagcacggccagtgccgc      |                 |                         |
| <i>Dnmt1</i> -Off-target2  | agagcggctgcagtaagccg        | tcacctgcacgcacagaaccagt       |                 |                         |
| <i>Dnmt1</i> -Off-target3  | ccggagtcctagagcgaagc        | gtgacaagaggacgaaaagcg         |                 |                         |
| <i>Dnmt1</i> -Off-target4  | ttttccaccggctctctcttg       | ggacagcttggctgaggac           |                 |                         |
| <i>Dnmt1</i> -Off-target5  | agcggattacctaagcaggg        | cggtgacctccggtgtttc           |                 |                         |
| <i>Dnmt1</i> -Off-target6  | ctttccaggtgatcggcg          | ttctgggatggagaagatcgc         |                 |                         |
| <i>Dnmt1</i> -Off-target7  | gagcagggtgggactcac          | gactcggcccctggatttc           |                 |                         |

|                           |                     |                      |  |  |
|---------------------------|---------------------|----------------------|--|--|
| <i>Dnmt1</i> -Off-target8 | cgaaggggaaaaccaggaa | ggtggcactgctagatctcc |  |  |
|---------------------------|---------------------|----------------------|--|--|

**Supplementary Table S2. List of amplicon sequence\_data used in this study.**

| <b>Amplicon_seq_data_name</b> | <b>Figure</b> | <b>Target gene</b> | <b>SRA_data_name<br/>(SRR_numbers)</b>         | <b>PRJNA_numbers</b> | <b>Barcode</b> |
|-------------------------------|---------------|--------------------|------------------------------------------------|----------------------|----------------|
| RNF2_non_guide_repeat1        | 2B            | RNF2               | Fig2-293T-PE-amplicon-seq1.fq.gz (SRR14891600) | PRJNA739843          | AGTTCAGG       |
| RNF2_non_guide_repeat2        | 2B            | RNF2               | Fig2-293T-PE-amplicon-seq2.fq.gz (SRR14891599) | PRJNA739843          | AGTTCAGG       |
| RNF2_non_guide_repeat3        | 2B            | RNF2               | Fig2-293T-PE-amplicon-seq3.fq.gz (SRR14891598) | PRJNA739843          | AGTTCAGG       |
| RNF2_PE3_FL_repeat1           | 2B            | RNF2               | Fig2-293T-PE-amplicon-seq1.fq.gz (SRR14891600) | PRJNA739843          | GACCTGAA       |
| RNF2_PE3_FL_repeat2           | 2B            | RNF2               | Fig2-293T-PE-amplicon-seq2.fq.gz (SRR14891599) | PRJNA739843          | GACCTGAA       |
| RNF2_PE3_FL_repeat3           | 2B            | RNF2               | Fig2-293T-PE-amplicon-seq3.fq.gz (SRR14891598) | PRJNA739843          | GACCTGAA       |
| RNF2_SplitPE1005_repeat1      | 2B            | RNF2               | Fig2-293T-PE-amplicon-seq1.fq.gz (SRR14891600) | PRJNA739843          | TCTCTACT       |
| RNF2_SplitPE1005_repeat2      | 2B            | RNF2               | Fig2-293T-PE-amplicon-seq2.fq.gz (SRR14891599) | PRJNA739843          | TCTCTACT       |
| RNF2_SplitPE1005_repeat3      | 2B            | RNF2               | Fig2-293T-PE-amplicon-seq3.fq.gz (SRR14891598) | PRJNA739843          | TCTCTACT       |
| RNF2_SplitPE1024_repeat1      | 2B            | RNF2               | Fig2-293T-PE-amplicon-seq1.fq.gz (SRR14891600) | PRJNA739843          | CTCTCGTC       |
| RNF2_SplitPE1024_repeat2      | 2B            | RNF2               | Fig2-293T-PE-amplicon-seq2.fq.gz (SRR14891599) | PRJNA739843          | CTCTCGTC       |
| RNF2_SplitPE1024_repeat3      | 2B            | RNF2               | Fig2-293T-PE-amplicon-seq3.fq.gz (SRR14891598) | PRJNA739843          | CTCTCGTC       |
| VEGFA_non_guide_repeat1       | 2C            | VEGFA              | Fig2-293T-PE-amplicon-seq1.fq.gz (SRR14891600) | PRJNA739843          | ATCCACTG       |
| VEGFA_non_guide_repeat2       | 2C            | VEGFA              | Fig2-293T-PE-amplicon-seq2.fq.gz (SRR14891599) | PRJNA739843          | ATCCACTG       |
| VEGFA_non_guide_repeat3       | 2C            | VEGFA              | Fig2-293T-PE-amplicon-seq3.fq.gz (SRR14891598) | PRJNA739843          | ATCCACTG       |
| VEGFA_PE3_FL_repeat1          | 2C            | VEGFA              | Fig2-293T-PE-amplicon-seq1.fq.gz (SRR14891600) | PRJNA739843          | GCTTGTC        |
| VEGFA_PE3_FL_repeat2          | 2C            | VEGFA              | Fig2-293T-PE-amplicon-seq2.fq.gz (SRR14891599) | PRJNA739843          | GCTTGTC        |
| VEGFA_PE3_FL_repeat3          | 2C            | VEGFA              | Fig2-293T-PE-amplicon-seq3.fq.gz (SRR14891598) | PRJNA739843          | GCTTGTC        |
| VEGFA_SplitPE1005_repeat1     | 2C            | VEGFA              | Fig2-293T-PE-amplicon-seq1.fq.gz (SRR14891600) | PRJNA739843          | CAAGCTAG       |
| VEGFA_SplitPE1005_repeat2     | 2C            | VEGFA              | Fig2-293T-PE-amplicon-seq2.fq.gz (SRR14891599) | PRJNA739843          | CAAGCTAG       |
| VEGFA_SplitPE1005_repeat3     | 2C            | VEGFA              | Fig2-293T-PE-amplicon-seq3.fq.gz (SRR14891598) | PRJNA739843          | CAAGCTAG       |
| VEGFA_SplitPE1024_repeat1     | 2C            | VEGFA              | Fig2-293T-PE-amplicon-seq1.fq.gz (SRR14891600) | PRJNA739843          | TGGATCGA       |
| VEGFA_SplitPE1024_repeat2     | 2C            | VEGFA              | Fig2-293T-PE-amplicon-seq2.fq.gz (SRR14891599) | PRJNA739843          | TGGATCGA       |
| VEGFA_SplitPE1024_repeat3     | 2C            | VEGFA              | Fig2-293T-PE-amplicon-seq3.fq.gz (SRR14891598) | PRJNA739843          | TGGATCGA       |
| HEK3_non_guide_repeat1        | 2D            | HEK3               | Fig2-293T-PE-amplicon-seq1.fq.gz (SRR14891600) | PRJNA739843          | AGCGCTAG       |
| HEK3_non_guide_repeat2        | 2D            | HEK3               | Fig2-293T-PE-amplicon-seq2.fq.gz (SRR14891599) | PRJNA739843          | AGCGCTAG       |
| HEK3_non_guide_repeat3        | 2D            | HEK3               | Fig2-293T-PE-amplicon-seq3.fq.gz (SRR14891598) | PRJNA739843          | AGCGCTAG       |

|                              |    |      |                                                |             |          |
|------------------------------|----|------|------------------------------------------------|-------------|----------|
| HEK3_PE3_FL_repeat1          | 2D | HEK3 | Fig2-293T-PE-amplicon-seq1.fq.gz (SRR14891600) | PRJNA739843 | GATATCGA |
| HEK3_PE3_FL_repeat2          | 2D | HEK3 | Fig2-293T-PE-amplicon-seq2.fq.gz (SRR14891599) | PRJNA739843 | GATATCGA |
| HEK3_PE3_FL_repeat3          | 2D | HEK3 | Fig2-293T-PE-amplicon-seq3.fq.gz (SRR14891598) | PRJNA739843 | GATATCGA |
| HEK3_SplitPE1005_repeat1     | 2D | HEK3 | Fig2-293T-PE-amplicon-seq1.fq.gz (SRR14891600) | PRJNA739843 | CGCAGACG |
| HEK3_SplitPE1005_repeat2     | 2D | HEK3 | Fig2-293T-PE-amplicon-seq2.fq.gz (SRR14891599) | PRJNA739843 | CGCAGACG |
| HEK3_SplitPE1005_repeat3     | 2D | HEK3 | Fig2-293T-PE-amplicon-seq3.fq.gz (SRR14891598) | PRJNA739843 | CGCAGACG |
| HEK3_SplitPE1024_repeat1     | 2D | HEK3 | Fig2-293T-PE-amplicon-seq1.fq.gz (SRR14891600) | PRJNA739843 | TATGAGTA |
| HEK3_SplitPE1024_repeat2     | 2D | HEK3 | Fig2-293T-PE-amplicon-seq2.fq.gz (SRR14891599) | PRJNA739843 | TATGAGTA |
| HEK3_SplitPE1024_repeat3     | 2D | HEK3 | Fig2-293T-PE-amplicon-seq3.fq.gz (SRR14891598) | PRJNA739843 | TATGAGTA |
| PRNP_non_guide_repeat1       | 2E | PRNP | Fig2-293T-PE-amplicon-seq1.fq.gz (SRR14891600) | PRJNA739843 | CCAAGTCT |
| PRNP_non_guide_repeat2       | 2E | PRNP | Fig2-293T-PE-amplicon-seq2.fq.gz (SRR14891599) | PRJNA739843 | CCAAGTCT |
| PRNP_non_guide_repeat3       | 2E | PRNP | Fig2-293T-PE-amplicon-seq3.fq.gz (SRR14891598) | PRJNA739843 | CCAAGTCT |
| PRNP_PE3_FL_repeat1          | 2E | PRNP | Fig2-293T-PE-amplicon-seq1.fq.gz (SRR14891600) | PRJNA739843 | TTGGACTC |
| PRNP_PE3_FL_repeat2          | 2E | PRNP | Fig2-293T-PE-amplicon-seq2.fq.gz (SRR14891599) | PRJNA739843 | TTGGACTC |
| PRNP_PE3_FL_repeat3          | 2E | PRNP | Fig2-293T-PE-amplicon-seq3.fq.gz (SRR14891598) | PRJNA739843 | TTGGACTC |
| PRNP_SplitPE1005_repeat1     | 2E | PRNP | Fig2-293T-PE-amplicon-seq1.fq.gz (SRR14891600) | PRJNA739843 | GGCTTAAG |
| PRNP_SplitPE1005_repeat2     | 2E | PRNP | Fig2-293T-PE-amplicon-seq2.fq.gz (SRR14891599) | PRJNA739843 | GGCTTAAG |
| PRNP_SplitPE1005_repeat3     | 2E | PRNP | Fig2-293T-PE-amplicon-seq3.fq.gz (SRR14891598) | PRJNA739843 | GGCTTAAG |
| PRNP_SplitPE1024_repeat1     | 2E | PRNP | Fig2-293T-PE-amplicon-seq1.fq.gz (SRR14891600) | PRJNA739843 | AATCCGGA |
| PRNP_SplitPE1024_repeat2     | 2E | PRNP | Fig2-293T-PE-amplicon-seq2.fq.gz (SRR14891599) | PRJNA739843 | AATCCGGA |
| PRNP_SplitPE1024_repeat3     | 2E | PRNP | Fig2-293T-PE-amplicon-seq3.fq.gz (SRR14891598) | PRJNA739843 | AATCCGGA |
| HEK3_AAV_GFP_repeat1         | 3C | HEK3 | Fig3-293T-HEK3-AAV-GFP-1.fastq                 | PRJNA739843 | None     |
| HEK3_AAV_GFP_repeat2         | 3C | HEK3 | Fig3-293T-HEK3-AAV-GFP-2.fastq                 | PRJNA739843 | None     |
| HEK3_AAV_GFP_repeat3         | 3C | HEK3 | Fig3-293T-HEK3-AAV-GFP-3.fastq                 | PRJNA739843 | None     |
| HEK3_AAV_SplitPE1005_repeat1 | 3C | HEK3 | Fig3-293T-HEK3-AAV-split1005-1.fastq           | PRJNA739843 | None     |
| HEK3_AAV_SplitPE1005_repeat2 | 3C | HEK3 | Fig3-293T-HEK3-AAV-split1005-2.fastq           | PRJNA739843 | None     |
| HEK3_AAV_SplitPE1005_repeat3 | 3C | HEK3 | Fig3-293T-HEK3-AAV-split1005-3.fastq           | PRJNA739843 | None     |
| HEK3_AAV_SplitPE1024_repeat1 | 3C | HEK3 | Fig3-293T-HEK3-AAV-split1024-1.fastq           | PRJNA739843 | None     |
| HEK3_AAV_SplitPE1024_repeat2 | 3C | HEK3 | Fig3-293T-HEK3-AAV-split1024-2.fastq           | PRJNA739843 | None     |

|                                   |    |                  |                                                |             |          |
|-----------------------------------|----|------------------|------------------------------------------------|-------------|----------|
| HEK3_AAV_SplitPE1024_repeat3      | 3C | HEK3             | Fig3-293T-HEK3-AAV-split1024-3.fastq           | PRJNA739843 | None     |
| VEGFA_AAV_GFP_repeat1             | 3D | VEGFA            | Fig3-293T-VEGFA-AAV-GFP-1.fastq                | PRJNA739843 | None     |
| VEGFA_AAV_GFP_repeat2             | 3D | VEGFA            | Fig3-293T-VEGFA-AAV-GFP-2.fastq                | PRJNA739843 | None     |
| VEGFA_AAV_GFP_repeat3             | 3D | VEGFA            | Fig3-293T-VEGFA-AAV-GFP-3.fastq                | PRJNA739843 | None     |
| VEGFA_AAV_SplitPE1005_repeat1     | 3D | VEGFA            | Fig3-293T-VEGFA-AAV-splitPE1005-1.fastq        | PRJNA739843 | None     |
| VEGFA_AAV_SplitPE1005_repeat2     | 3D | VEGFA            | Fig3-293T-VEGFA-AAV-splitPE1005-2.fastq        | PRJNA739843 | None     |
| VEGFA_AAV_SplitPE1005_repeat3     | 3D | VEGFA            | Fig3-293T-VEGFA-AAV-splitPE1005-3.fastq        | PRJNA739843 | None     |
| VEGFA_AAV_SplitPE1024_repeat1     | 3D | VEGFA            | Fig3-293T-VEGFA-AAV-splitPE1024-1.fastq        | PRJNA739843 | None     |
| VEGFA_AAV_SplitPE1024_repeat2     | 3D | VEGFA            | Fig3-293T-VEGFA-AAV-splitPE1024-2.fastq        | PRJNA739843 | None     |
| VEGFA_AAV_SplitPE1024_repeat3     | 3D | VEGFA            | Fig3-293T-VEGFA-AAV-splitPE1024-3.fastq        | PRJNA739843 | None     |
| 293T_RNF2_AAV_GFP_repeat1         | 3E | RNF2             | Fig3-293T-RNF2-AAV-GFP-1.fastq                 | PRJNA739843 | None     |
| 293T_RNF2_AAV_GFP_repeat2         | 3E | RNF2             | Fig3-293T-RNF2-AAV-GFP-2.fastq                 | PRJNA739843 | None     |
| 293T_RNF2_AAV_GFP_repeat3         | 3E | RNF2             | Fig3-293T-RNF2-AAV-GFP-3.fastq                 | PRJNA739843 | None     |
| 293T_RNF2_AAV_SplitPE1005_repeat1 | 3E | RNF2             | Fig3-293T-RNF2-AAV-splitPE1005-1.fastq         | PRJNA739843 | None     |
| 293T_RNF2_AAV_SplitPE1005_repeat2 | 3E | RNF2             | Fig3-293T-RNF2-AAV-splitPE1005-2.fastq         | PRJNA739843 | None     |
| 293T_RNF2_AAV_SplitPE1005_repeat3 | 3E | RNF2             | Fig3-293T-RNF2-AAV-splitPE1005-3.fastq         | PRJNA739843 | None     |
| 293T_RNF2_AAV_SplitPE1024_repeat1 | 3E | RNF2             | Fig3-293T-RNF2-AAV-splitPE1024-1.fastq         | PRJNA739843 | None     |
| 293T_RNF2_AAV_SplitPE1024_repeat2 | 3E | RNF2             | Fig3-293T-RNF2-AAV-splitPE1024-2.fastq         | PRJNA739843 | None     |
| 293T_RNF2_AAV_SplitPE1024_repeat3 | 3E | RNF2             | Fig3-293T-RNF2-AAV-splitPE1024-3.fastq         | PRJNA739843 | None     |
| HeLa_RNF2_AAV_GFP_repeat1         | 3F | RNF2             | Fig3-HeLa-RNF2-AAV-GFP-1.fastq                 | PRJNA739843 | None     |
| HeLa_RNF2_AAV_GFP_repeat2         | 3F | RNF2             | Fig3-HeLa-RNF2-AAV-GFP-2.fastq                 | PRJNA739843 | None     |
| HeLa_RNF2_AAV_GFP_repeat3         | 3F | RNF2             | Fig3-HeLa-RNF2-AAV-GFP-3.fastq                 | PRJNA739843 | None     |
| HeLa_RNF2_AAV_SplitPE1005_repeat1 | 3F | RNF2             | Fig3-HeLa-RNF2-AAV-split1005-1.fastq           | PRJNA739843 | None     |
| HeLa_RNF2_AAV_SplitPE1005_repeat2 | 3F | RNF2             | Fig3-HeLa-RNF2-AAV-split1005-2.fastq           | PRJNA739843 | None     |
| HeLa_RNF2_AAV_SplitPE1005_repeat3 | 3F | RNF2             | Fig3-HeLa-RNF2-AAV-split1005-3.fastq           | PRJNA739843 | None     |
| HeLa_RNF2_AAV_SplitPE1024_repeat1 | 3F | RNF2             | Fig3-HeLa-RNF2-AAV-split1024-1.fastq           | PRJNA739843 | None     |
| HeLa_RNF2_AAV_SplitPE1024_repeat2 | 3F | RNF2             | Fig3-HeLa-RNF2-AAV-split1024-2.fastq           | PRJNA739843 | None     |
| HeLa_RNF2_AAV_SplitPE1024_repeat3 | 3F | RNF2             | Fig3-HeLa-RNF2-AAV-split1024-3.fastq           | PRJNA739843 | None     |
| 293T_RNF2_OT1_AAV_GFP_repeat1     | 4A | RNF2_off_target1 | Fig4-293T-PE-amplicon-seq1.fq.gz (SRR14891597) | PRJNA739843 | CTAGCGCT |

|                                        |    |                  |                                                |             |          |
|----------------------------------------|----|------------------|------------------------------------------------|-------------|----------|
| 293T_RNF2_OT1_AAV_GFP_repeat2          | 4A | RNF2_off_target1 | Fig4-293T-PE-amplicon-seq2.fq.gz (SRR14891595) | PRJNA739843 | CTAGCGCT |
| 293T_RNF2_OT1_AAV_GFP_repeat3          | 4A | RNF2_off_target1 | Fig4-293T-PE-amplicon-seq3.fq.gz (SRR14891594) | PRJNA739843 | CTAGCGCT |
| 293T_RNF2_OT1_AAV_Split PE1005_repeat1 | 4A | RNF2_off_target1 | Fig4-293T-PE-amplicon-seq1.fq.gz (SRR14891597) | PRJNA739843 | GCCACAGG |
| 293T_RNF2_OT1_AAV_Split PE1005_repeat2 | 4A | RNF2_off_target1 | Fig4-293T-PE-amplicon-seq2.fq.gz (SRR14891595) | PRJNA739843 | GCCACAGG |
| 293T_RNF2_OT1_AAV_Split PE1005_repeat3 | 4A | RNF2_off_target1 | Fig4-293T-PE-amplicon-seq3.fq.gz (SRR14891594) | PRJNA739843 | GCCACAGG |
| 293T_RNF2_OT1_AAV_Split PE1024_repeat1 | 4A | RNF2_off_target1 | Fig4-293T-PE-amplicon-seq1.fq.gz (SRR14891597) | PRJNA739843 | CATAATAC |
| 293T_RNF2_OT1_AAV_Split PE1024_repeat2 | 4A | RNF2_off_target1 | Fig4-293T-PE-amplicon-seq2.fq.gz (SRR14891595) | PRJNA739843 | CATAATAC |
| 293T_RNF2_OT1_AAV_Split PE1024_repeat3 | 4A | RNF2_off_target1 | Fig4-293T-PE-amplicon-seq3.fq.gz (SRR14891594) | PRJNA739843 | CATAATAC |
| 293T_RNF2_OT2_AAV_GFP_repeat1          | 4A | RNF2_off_target2 | Fig4-293T-PE-amplicon-seq1.fq.gz (SRR14891597) | PRJNA739843 | TCGATATC |
| 293T_RNF2_OT2_AAV_GFP_repeat2          | 4A | RNF2_off_target2 | Fig4-293T-PE-amplicon-seq2.fq.gz (SRR14891595) | PRJNA739843 | TCGATATC |
| 293T_RNF2_OT2_AAV_GFP_repeat3          | 4A | RNF2_off_target2 | Fig4-293T-PE-amplicon-seq3.fq.gz (SRR14891594) | PRJNA739843 | TCGATATC |
| 293T_RNF2_OT2_AAV_Split PE1005_repeat1 | 4A | RNF2_off_target2 | Fig4-293T-PE-amplicon-seq1.fq.gz (SRR14891597) | PRJNA739843 | ATTGTGAA |
| 293T_RNF2_OT2_AAV_Split PE1005_repeat2 | 4A | RNF2_off_target2 | Fig4-293T-PE-amplicon-seq2.fq.gz (SRR14891595) | PRJNA739843 | ATTGTGAA |
| 293T_RNF2_OT2_AAV_Split PE1005_repeat3 | 4A | RNF2_off_target2 | Fig4-293T-PE-amplicon-seq3.fq.gz (SRR14891594) | PRJNA739843 | ATTGTGAA |
| 293T_RNF2_OT2_AAV_Split PE1024_repeat1 | 4A | RNF2_off_target2 | Fig4-293T-PE-amplicon-seq1.fq.gz (SRR14891597) | PRJNA739843 | GATCTATC |
| 293T_RNF2_OT2_AAV_Split PE1024_repeat2 | 4A | RNF2_off_target2 | Fig4-293T-PE-amplicon-seq2.fq.gz (SRR14891595) | PRJNA739843 | GATCTATC |
| 293T_RNF2_OT2_AAV_Split PE1024_repeat3 | 4A | RNF2_off_target2 | Fig4-293T-PE-amplicon-seq3.fq.gz (SRR14891594) | PRJNA739843 | GATCTATC |
| HeLa_RNF2_OT1_AAV_GFP_repeat1          | 4A | RNF2_off_target1 | Fig4-HeLa-PE-amplicon-seq1.fq.gz (SRR14891593) | PRJNA739843 | CTAGCGCT |
| HeLa_RNF2_OT1_AAV_GFP_repeat2          | 4A | RNF2_off_target1 | Fig4-HeLa-PE-amplicon-seq2.fq.gz (SRR14891592) | PRJNA739843 | CTAGCGCT |
| HeLa_RNF2_OT1_AAV_GFP_repeat3          | 4A | RNF2_off_target1 | Fig4-HeLa-PE-amplicon-seq3.fq.gz (SRR14891591) | PRJNA739843 | CTAGCGCT |
| HeLa_RNF2_OT1_AAV_Split PE1005_repeat1 | 4A | RNF2_off_target1 | Fig4-HeLa-PE-amplicon-seq1.fq.gz (SRR14891593) | PRJNA739843 | GCCACAGG |
| HeLa_RNF2_OT1_AAV_Split PE1005_repeat2 | 4A | RNF2_off_target1 | Fig4-HeLa-PE-amplicon-seq2.fq.gz (SRR14891592) | PRJNA739843 | GCCACAGG |
| HeLa_RNF2_OT1_AAV_Split PE1005_repeat3 | 4A | RNF2_off_target1 | Fig4-HeLa-PE-amplicon-seq3.fq.gz (SRR14891591) | PRJNA739843 | GCCACAGG |
| HeLa_RNF2_OT1_AAV_Split PE1024_repeat1 | 4A | RNF2_off_target1 | Fig4-HeLa-PE-amplicon-seq1.fq.gz (SRR14891593) | PRJNA739843 | CATAATAC |
| HeLa_RNF2_OT1_AAV_Split PE1024_repeat2 | 4A | RNF2_off_target1 | Fig4-HeLa-PE-amplicon-seq2.fq.gz (SRR14891592) | PRJNA739843 | CATAATAC |
| HeLa_RNF2_OT1_AAV_Split PE1024_repeat3 | 4A | RNF2_off_target1 | Fig4-HeLa-PE-amplicon-seq3.fq.gz (SRR14891591) | PRJNA739843 | CATAATAC |
| HeLa_RNF2_OT2_AAV_GFP_repeat1          | 4A | RNF2_off_target2 | Fig4-HeLa-PE-amplicon-seq1.fq.gz (SRR14891593) | PRJNA739843 | TCGATATC |
| HeLa_RNF2_OT2_AAV_GFP_repeat2          | 4A | RNF2_off_target2 | Fig4-HeLa-PE-amplicon-seq2.fq.gz (SRR14891592) | PRJNA739843 | TCGATATC |
| HeLa_RNF2_OT2_AAV_GFP_repeat3          | 4A | RNF2_off_target2 | Fig4-HeLa-PE-amplicon-seq3.fq.gz (SRR14891591) | PRJNA739843 | TCGATATC |

|                                       |    |                  |                                                |             |          |
|---------------------------------------|----|------------------|------------------------------------------------|-------------|----------|
| HeLa_RNF2_OT2_AAV_SplitPE1005_repeat1 | 4A | RNF2_off_target2 | Fig4-HeLa-PE-amplicon-seq1.fq.gz (SRR14891593) | PRJNA739843 | ATTGTGAA |
| HeLa_RNF2_OT2_AAV_SplitPE1005_repeat2 | 4A | RNF2_off_target2 | Fig4-HeLa-PE-amplicon-seq2.fq.gz (SRR14891592) | PRJNA739843 | ATTGTGAA |
| HeLa_RNF2_OT2_AAV_SplitPE1005_repeat3 | 4A | RNF2_off_target2 | Fig4-HeLa-PE-amplicon-seq3.fq.gz (SRR14891591) | PRJNA739843 | ATTGTGAA |
| HeLa_RNF2_OT2_AAV_SplitPE1024_repeat1 | 4A | RNF2_off_target2 | Fig4-HeLa-PE-amplicon-seq1.fq.gz (SRR14891593) | PRJNA739843 | GATCTATC |
| HeLa_RNF2_OT2_AAV_SplitPE1024_repeat2 | 4A | RNF2_off_target2 | Fig4-HeLa-PE-amplicon-seq2.fq.gz (SRR14891592) | PRJNA739843 | GATCTATC |
| HeLa_RNF2_OT2_AAV_SplitPE1024_repeat3 | 4A | RNF2_off_target2 | Fig4-HeLa-PE-amplicon-seq3.fq.gz (SRR14891591) | PRJNA739843 | GATCTATC |
| HEK3_OT1_AAV_GFP_repeat1              | 4B | HEK3_off_target1 | Fig4-293T-PE-amplicon-seq1.fq.gz (SRR14891597) | PRJNA739843 | CCTGTGGC |
| HEK3_OT1_AAV_GFP_repeat2              | 4B | HEK3_off_target1 | Fig4-293T-PE-amplicon-seq2.fq.gz (SRR14891595) | PRJNA739843 | CCTGTGGC |
| HEK3_OT1_AAV_GFP_repeat3              | 4B | HEK3_off_target1 | Fig4-293T-PE-amplicon-seq3.fq.gz (SRR14891594) | PRJNA739843 | CCTGTGGC |
| HEK3_OT1_AAV_SplitPE1005_repeat1      | 4B | HEK3_off_target1 | Fig4-293T-PE-amplicon-seq1.fq.gz (SRR14891597) | PRJNA739843 | GCCAAGGT |
| HEK3_OT1_AAV_SplitPE1005_repeat2      | 4B | HEK3_off_target1 | Fig4-293T-PE-amplicon-seq2.fq.gz (SRR14891595) | PRJNA739843 | GCCAAGGT |
| HEK3_OT1_AAV_SplitPE1005_repeat3      | 4B | HEK3_off_target1 | Fig4-293T-PE-amplicon-seq3.fq.gz (SRR14891594) | PRJNA739843 | GCCAAGGT |
| HEK3_OT1_AAV_SplitPE1024_repeat1      | 4B | HEK3_off_target1 | Fig4-293T-PE-amplicon-seq1.fq.gz (SRR14891597) | PRJNA739843 | CACTACGA |
| HEK3_OT1_AAV_SplitPE1024_repeat2      | 4B | HEK3_off_target1 | Fig4-293T-PE-amplicon-seq2.fq.gz (SRR14891595) | PRJNA739843 | CACTACGA |
| HEK3_OT1_AAV_SplitPE1024_repeat3      | 4B | HEK3_off_target1 | Fig4-293T-PE-amplicon-seq3.fq.gz (SRR14891594) | PRJNA739843 | CACTACGA |
| HEK3_OT2_AAV_GFP_repeat1              | 4B | HEK3_off_target2 | Fig4-293T-PE-amplicon-seq1.fq.gz (SRR14891597) | PRJNA739843 | TTCACAAT |
| HEK3_OT2_AAV_GFP_repeat2              | 4B | HEK3_off_target2 | Fig4-293T-PE-amplicon-seq2.fq.gz (SRR14891595) | PRJNA739843 | TTCACAAT |
| HEK3_OT2_AAV_GFP_repeat3              | 4B | HEK3_off_target2 | Fig4-293T-PE-amplicon-seq3.fq.gz (SRR14891594) | PRJNA739843 | TTCACAAT |
| HEK3_OT2_AAV_SplitPE1005_repeat1      | 4B | HEK3_off_target2 | Fig4-293T-PE-amplicon-seq1.fq.gz (SRR14891597) | PRJNA739843 | ATTGGAAC |
| HEK3_OT2_AAV_SplitPE1005_repeat2      | 4B | HEK3_off_target2 | Fig4-293T-PE-amplicon-seq2.fq.gz (SRR14891595) | PRJNA739843 | ATTGGAAC |
| HEK3_OT2_AAV_SplitPE1005_repeat3      | 4B | HEK3_off_target2 | Fig4-293T-PE-amplicon-seq3.fq.gz (SRR14891594) | PRJNA739843 | ATTGGAAC |
| HEK3_OT2_AAV_SplitPE1024_repeat1      | 4B | HEK3_off_target2 | Fig4-293T-PE-amplicon-seq1.fq.gz (SRR14891597) | PRJNA739843 | GCAGAATC |
| HEK3_OT2_AAV_SplitPE1024_repeat2      | 4B | HEK3_off_target2 | Fig4-293T-PE-amplicon-seq2.fq.gz (SRR14891595) | PRJNA739843 | GCAGAATC |
| HEK3_OT2_AAV_SplitPE1024_repeat3      | 4B | HEK3_off_target2 | Fig4-293T-PE-amplicon-seq3.fq.gz (SRR14891594) | PRJNA739843 | GCAGAATC |
| HEK3_OT3_AAV_GFP_repeat1              | 4B | HEK3_off_target3 | Fig4-293T-PE-amplicon-seq1.fq.gz (SRR14891597) | PRJNA739843 | AACAGGAA |
| HEK3_OT3_AAV_GFP_repeat2              | 4B | HEK3_off_target3 | Fig4-293T-PE-amplicon-seq2.fq.gz (SRR14891595) | PRJNA739843 | AACAGGAA |
| HEK3_OT3_AAV_GFP_repeat3              | 4B | HEK3_off_target3 | Fig4-293T-PE-amplicon-seq3.fq.gz (SRR14891594) | PRJNA739843 | AACAGGAA |
| HEK3_OT3_AAV_SplitPE1005_repeat1      | 4B | HEK3_off_target3 | Fig4-293T-PE-amplicon-seq1.fq.gz (SRR14891597) | PRJNA739843 | TAGAGCGC |
| HEK3_OT3_AAV_SplitPE1005_repeat2      | 4B | HEK3_off_target3 | Fig4-293T-PE-amplicon-seq2.fq.gz (SRR14891595) | PRJNA739843 | TAGAGCGC |

|                                   |    |                   |                                                |             |          |
|-----------------------------------|----|-------------------|------------------------------------------------|-------------|----------|
| HEK3_OT3_AAV_SplitPE1005_repeat3  | 4B | HEK3_off_target3  | Fig4-293T-PE-amplicon-seq3.fq.gz (SRR14891594) | PRJNA739843 | TAGAGCGC |
| HEK3_OT3_AAV_SplitPE1024_repeat1  | 4B | HEK3_off_target3  | Fig4-293T-PE-amplicon-seq1.fq.gz (SRR14891597) | PRJNA739843 | ACCACTTA |
| HEK3_OT3_AAV_SplitPE1024_repeat2  | 4B | HEK3_off_target3  | Fig4-293T-PE-amplicon-seq2.fq.gz (SRR14891595) | PRJNA739843 | ACCACTTA |
| HEK3_OT3_AAV_SplitPE1024_repeat3  | 4B | HEK3_off_target3  | Fig4-293T-PE-amplicon-seq3.fq.gz (SRR14891594) | PRJNA739843 | ACCACTTA |
| HEK3_OT4_AAV_GFP_repeat1          | 4B | HEK3_off_target4  | Fig4-293T-PE-amplicon-seq1.fq.gz (SRR14891597) | PRJNA739843 | GGTGAAGG |
| HEK3_OT4_AAV_GFP_repeat2          | 4B | HEK3_off_target4  | Fig4-293T-PE-amplicon-seq2.fq.gz (SRR14891595) | PRJNA739843 | GGTGAAGG |
| HEK3_OT4_AAV_GFP_repeat3          | 4B | HEK3_off_target4  | Fig4-293T-PE-amplicon-seq3.fq.gz (SRR14891594) | PRJNA739843 | GGTGAAGG |
| HEK3_OT4_AAV_SplitPE1005_repeat1  | 4B | HEK3_off_target4  | Fig4-293T-PE-amplicon-seq1.fq.gz (SRR14891597) | PRJNA739843 | CGAGATAT |
| HEK3_OT4_AAV_SplitPE1005_repeat2  | 4B | HEK3_off_target4  | Fig4-293T-PE-amplicon-seq2.fq.gz (SRR14891595) | PRJNA739843 | CGAGATAT |
| HEK3_OT4_AAV_SplitPE1005_repeat3  | 4B | HEK3_off_target4  | Fig4-293T-PE-amplicon-seq3.fq.gz (SRR14891594) | PRJNA739843 | CGAGATAT |
| HEK3_OT4_AAV_SplitPE1024_repeat1  | 4B | HEK3_off_target4  | Fig4-293T-PE-amplicon-seq1.fq.gz (SRR14891597) | PRJNA739843 | TGTCGTAG |
| HEK3_OT4_AAV_SplitPE1024_repeat2  | 4B | HEK3_off_target4  | Fig4-293T-PE-amplicon-seq2.fq.gz (SRR14891595) | PRJNA739843 | TGTCGTAG |
| HEK3_OT4_AAV_SplitPE1024_repeat3  | 4B | HEK3_off_target4  | Fig4-293T-PE-amplicon-seq3.fq.gz (SRR14891594) | PRJNA739843 | TGTCGTAG |
| VEGFA_OT1_AAV_GFP_repeat1         | 4C | VEGFA_off_target1 | Fig4-293T-PE-amplicon-seq1.fq.gz (SRR14891597) | PRJNA739843 | CTGCTTCC |
| VEGFA_OT1_AAV_GFP_repeat2         | 4C | VEGFA_off_target1 | Fig4-293T-PE-amplicon-seq2.fq.gz (SRR14891595) | PRJNA739843 | CTGCTTCC |
| VEGFA_OT1_AAV_GFP_repeat3         | 4C | VEGFA_off_target1 | Fig4-293T-PE-amplicon-seq3.fq.gz (SRR14891594) | PRJNA739843 | CTGCTTCC |
| VEGFA_OT1_AAV_SplitPE1005_repeat1 | 4C | VEGFA_off_target1 | Fig4-293T-PE-amplicon-seq1.fq.gz (SRR14891597) | PRJNA739843 | AGTACTCC |
| VEGFA_OT1_AAV_SplitPE1005_repeat2 | 4C | VEGFA_off_target1 | Fig4-293T-PE-amplicon-seq2.fq.gz (SRR14891595) | PRJNA739843 | AGTACTCC |
| VEGFA_OT1_AAV_SplitPE1005_repeat3 | 4C | VEGFA_off_target1 | Fig4-293T-PE-amplicon-seq3.fq.gz (SRR14891594) | PRJNA739843 | AGTACTCC |
| VEGFA_OT1_AAV_SplitPE1024_repeat1 | 4C | VEGFA_off_target1 | Fig4-293T-PE-amplicon-seq1.fq.gz (SRR14891597) | PRJNA739843 | CCATTCGA |
| VEGFA_OT1_AAV_SplitPE1024_repeat2 | 4C | VEGFA_off_target1 | Fig4-293T-PE-amplicon-seq2.fq.gz (SRR14891595) | PRJNA739843 | CCATTCGA |
| VEGFA_OT1_AAV_SplitPE1024_repeat3 | 4C | VEGFA_off_target1 | Fig4-293T-PE-amplicon-seq3.fq.gz (SRR14891594) | PRJNA739843 | CCATTCGA |
| VEGFA_OT2_AAV_GFP_repeat1         | 4C | VEGFA_off_target2 | Fig4-293T-PE-amplicon-seq1.fq.gz (SRR14891597) | PRJNA739843 | TCATCCTT |
| VEGFA_OT2_AAV_GFP_repeat2         | 4C | VEGFA_off_target2 | Fig4-293T-PE-amplicon-seq2.fq.gz (SRR14891595) | PRJNA739843 | TCATCCTT |
| VEGFA_OT2_AAV_GFP_repeat3         | 4C | VEGFA_off_target2 | Fig4-293T-PE-amplicon-seq3.fq.gz (SRR14891594) | PRJNA739843 | TCATCCTT |
| VEGFA_OT2_AAV_SplitPE1005_repeat1 | 4C | VEGFA_off_target2 | Fig4-293T-PE-amplicon-seq1.fq.gz (SRR14891597) | PRJNA739843 | GACGTCTT |
| VEGFA_OT2_AAV_SplitPE1005_repeat2 | 4C | VEGFA_off_target2 | Fig4-293T-PE-amplicon-seq2.fq.gz (SRR14891595) | PRJNA739843 | GACGTCTT |
| VEGFA_OT2_AAV_SplitPE1005_repeat3 | 4C | VEGFA_off_target2 | Fig4-293T-PE-amplicon-seq3.fq.gz (SRR14891594) | PRJNA739843 | GACGTCTT |
| VEGFA_OT2_AAV_SplitPE1024_repeat1 | 4C | VEGFA_off_target2 | Fig4-293T-PE-amplicon-seq1.fq.gz (SRR14891597) | PRJNA739843 | ACACTAAG |



|                                      |    |                   |                                                |             |          |
|--------------------------------------|----|-------------------|------------------------------------------------|-------------|----------|
| VEGFA_OT2_AAV_SplitPE1_024_repeat2   | 4C | VEGFA_off_target2 | Fig4-293T-PE-amplicon-seq2.fq.gz (SRR14891595) | PRJNA739843 | ACACTAAG |
| VEGFA_OT2_AAV_SplitPE1_024_repeat3   | 4C | VEGFA_off_target2 | Fig4-293T-PE-amplicon-seq3.fq.gz (SRR14891594) | PRJNA739843 | ACACTAAG |
| VEGFA_OT3_AAV_GFP_rep_eat1           | 4C | VEGFA_off_target3 | Fig4-293T-PE-amplicon-seq1.fq.gz (SRR14891597) | PRJNA739843 | AGGTTATA |
| VEGFA_OT3_AAV_GFP_rep_eat2           | 4C | VEGFA_off_target3 | Fig4-293T-PE-amplicon-seq2.fq.gz (SRR14891595) | PRJNA739843 | AGGTTATA |
| VEGFA_OT3_AAV_GFP_rep_eat3           | 4C | VEGFA_off_target3 | Fig4-293T-PE-amplicon-seq3.fq.gz (SRR14891594) | PRJNA739843 | AGGTTATA |
| VEGFA_OT3_AAV_SplitPE1_005_repeat1   | 4C | VEGFA_off_target3 | Fig4-293T-PE-amplicon-seq1.fq.gz (SRR14891597) | PRJNA739843 | TGCGAGAC |
| VEGFA_OT3_AAV_SplitPE1_005_repeat2   | 4C | VEGFA_off_target3 | Fig4-293T-PE-amplicon-seq2.fq.gz (SRR14891595) | PRJNA739843 | TGCGAGAC |
| VEGFA_OT3_AAV_SplitPE1_005_repeat3   | 4C | VEGFA_off_target3 | Fig4-293T-PE-amplicon-seq3.fq.gz (SRR14891594) | PRJNA739843 | TGCGAGAC |
| VEGFA_OT3_AAV_SplitPE1_024_repeat1   | 4C | VEGFA_off_target3 | Fig4-293T-PE-amplicon-seq1.fq.gz (SRR14891597) | PRJNA739843 | GTGTCGGA |
| VEGFA_OT3_AAV_SplitPE1_024_repeat2   | 4C | VEGFA_off_target3 | Fig4-293T-PE-amplicon-seq2.fq.gz (SRR14891595) | PRJNA739843 | GTGTCGGA |
| VEGFA_OT3_AAV_SplitPE1_024_repeat3   | 4C | VEGFA_off_target3 | Fig4-293T-PE-amplicon-seq3.fq.gz (SRR14891594) | PRJNA739843 | GTGTCGGA |
| VEGFA_OT4_AAV_GFP_rep_eat1           | 4C | VEGFA_off_target4 | Fig4-293T-PE-amplicon-seq1.fq.gz (SRR14891597) | PRJNA739843 | CTCACCAA |
| VEGFA_OT4_AAV_GFP_rep_eat2           | 4C | VEGFA_off_target4 | Fig4-293T-PE-amplicon-seq2.fq.gz (SRR14891595) | PRJNA739843 | CTCACCAA |
| VEGFA_OT4_AAV_GFP_rep_eat3           | 4C | VEGFA_off_target4 | Fig4-293T-PE-amplicon-seq3.fq.gz (SRR14891594) | PRJNA739843 | CTCACCAA |
| VEGFA_OT4_AAV_SplitPE1_005_repeat1   | 4C | VEGFA_off_target4 | Fig4-293T-PE-amplicon-seq1.fq.gz (SRR14891597) | PRJNA739843 | ACAGGCGC |
| VEGFA_OT4_AAV_SplitPE1_005_repeat2   | 4C | VEGFA_off_target4 | Fig4-293T-PE-amplicon-seq2.fq.gz (SRR14891595) | PRJNA739843 | ACAGGCGC |
| VEGFA_OT4_AAV_SplitPE1_005_repeat3   | 4C | VEGFA_off_target4 | Fig4-293T-PE-amplicon-seq3.fq.gz (SRR14891594) | PRJNA739843 | ACAGGCGC |
| VEGFA_OT4_AAV_SplitPE1_024_repeat1   | 4C | VEGFA_off_target4 | Fig4-293T-PE-amplicon-seq1.fq.gz (SRR14891597) | PRJNA739843 | CCTTCACC |
| VEGFA_OT4_AAV_SplitPE1_024_repeat2   | 4C | VEGFA_off_target4 | Fig4-293T-PE-amplicon-seq2.fq.gz (SRR14891595) | PRJNA739843 | CCTTCACC |
| VEGFA_OT4_AAV_SplitPE1_024_repeat3   | 4C | VEGFA_off_target4 | Fig4-293T-PE-amplicon-seq3.fq.gz (SRR14891594) | PRJNA739843 | CCTTCACC |
| Dnmt1_EF1 $\alpha$ _non_guide_eye1   | 5E | Dnmt1             | Dnmt1-ON-P1.fq.gz (SRR14885688)                | PRJNA739877 | GGACTTGG |
| Dnmt1_EF1 $\alpha$ _non_guide_eye2   | 5E | Dnmt1             | Dnmt1-ON-P1.fq.gz (SRR14885688)                | PRJNA739877 | AAGTCCAA |
| Dnmt1_EF1 $\alpha$ _non_guide_eye3   | 5E | Dnmt1             | Dnmt1-ON-P1.fq.gz (SRR14885688)                | PRJNA739877 | ATCCACTG |
| Dnmt1_EF1 $\alpha$ _non_guide_eye4   | 5E | Dnmt1             | Dnmt1-ON-P1.fq.gz (SRR14885688)                | PRJNA739877 | GCTTGTC  |
| Dnmt1_EF1 $\alpha$ _SplitPE1024_eye1 | 5E | Dnmt1             | Dnmt1-ON-P2.fq.gz (SRR14885696)                | PRJNA739877 | GGACTTGG |
| Dnmt1_EF1 $\alpha$ _SplitPE1024_eye2 | 5E | Dnmt1             | Dnmt1-ON-P2.fq.gz (SRR14885696)                | PRJNA739877 | AAGTCCAA |
| Dnmt1_EF1 $\alpha$ _SplitPE1024_eye3 | 5E | Dnmt1             | Dnmt1-ON-P2.fq.gz (SRR14885696)                | PRJNA739877 | TGGATCGA |
| Dnmt1_EF1 $\alpha$ _SplitPE1024_eye4 | 5E | Dnmt1             | Dnmt1-ON-P2.fq.gz (SRR14885696)                | PRJNA739877 | AGTTCAGG |
| Dnmt1_EF1 $\alpha$ _SplitPE1024_eye5 | 5E | Dnmt1             | Dnmt1-ON-P2.fq.gz (SRR14885696)                | PRJNA739877 | GACCTGAA |

|                                             |    |                       |                                    |             |          |
|---------------------------------------------|----|-----------------------|------------------------------------|-------------|----------|
| Dnmt1_CMV_non_guide_eye1                    | 5E | Dnmt1                 | Dnmt1-ON-P1.fq.gz<br>(SRR14885688) | PRJNA739877 | TCTCTACT |
| Dnmt1_CMV_non_guide_eye2                    | 5E | Dnmt1                 | Dnmt1-ON-P1.fq.gz<br>(SRR14885688) | PRJNA739877 | CTCTCGTC |
| Dnmt1_CMV_non_guide_eye3                    | 5E | Dnmt1                 | Dnmt1-ON-P1.fq.gz<br>(SRR14885688) | PRJNA739877 | AATCCGGA |
| Dnmt1_CMV_non_guide_eye4                    | 5E | Dnmt1                 | Dnmt1-ON-P1.fq.gz<br>(SRR14885688) | PRJNA739877 | TAATACAG |
| Dnmt1_CMV_SplitPE1024_ey<br>e1              | 5E | Dnmt1                 | Dnmt1-ON-P2.fq.gz<br>(SRR14885696) | PRJNA739877 | TTGGACTC |
| Dnmt1_CMV_SplitPE1024_ey<br>e2              | 5E | Dnmt1                 | Dnmt1-ON-P2.fq.gz<br>(SRR14885696) | PRJNA739877 | ATGTAAGT |
| Dnmt1_CMV_SplitPE1024_ey<br>e3              | 5E | Dnmt1                 | Dnmt1-ON-P2.fq.gz<br>(SRR14885696) | PRJNA739877 | GCACGGAC |
| Dnmt1_CMV_SplitPE1024_ey<br>e4              | 5E | Dnmt1                 | Dnmt1-ON-P2.fq.gz<br>(SRR14885696) | PRJNA739877 | GCAGAATT |
| Dnmt1_CMV_SplitPE1024_ey<br>e5              | 5E | Dnmt1                 | Dnmt1-ON-P2.fq.gz<br>(SRR14885696) | PRJNA739877 | ATGAGGCC |
| Dnmt1_OT1_EF1 $\alpha$<br>_non_guide_eye1   | S6 | Dnmt1_off_ta<br>rget1 | Dnmt1-OT-P6.fq.gz<br>(SRR14885692) | PRJNA739877 | AGTATCTT |
| Dnmt1_OT1_EF1 $\alpha$<br>_non_guide_eye2   | S6 | Dnmt1_off_ta<br>rget1 | Dnmt1-OT-P7.fq.gz<br>(SRR14885691) | PRJNA739877 | AGTATCTT |
| Dnmt1_OT1_EF1 $\alpha$<br>_non_guide_eye3   | S6 | Dnmt1_off_ta<br>rget1 | Dnmt1-OT-P8.fq.gz<br>(SRR14885690) | PRJNA739877 | AGTATCTT |
| Dnmt1_OT1_EF1 $\alpha$<br>_non_guide_eye4   | S6 | Dnmt1_off_ta<br>rget1 | Dnmt1-OT-P9.fq.gz<br>(SRR14885689) | PRJNA739877 | AGTATCTT |
| Dnmt1_OT1_EF1 $\alpha$<br>_SplitPE1024_eye1 | S6 | Dnmt1_off_ta<br>rget1 | Dnmt1-OT-P1.fq.gz<br>(SRR14885698) | PRJNA739877 | AGTATCTT |
| Dnmt1_OT1_EF1 $\alpha$<br>_SplitPE1024_eye2 | S6 | Dnmt1_off_ta<br>rget1 | Dnmt1-OT-P2.fq.gz<br>(SRR14885697) | PRJNA739877 | AGTATCTT |
| Dnmt1_OT1_EF1 $\alpha$<br>_SplitPE1024_eye3 | S6 | Dnmt1_off_ta<br>rget1 | Dnmt1-OT-P3.fq.gz<br>(SRR14885695) | PRJNA739877 | AGTATCTT |
| Dnmt1_OT1_EF1 $\alpha$<br>_SplitPE1024_eye4 | S6 | Dnmt1_off_ta<br>rget1 | Dnmt1-OT-P4.fq.gz<br>(SRR14885694) | PRJNA739877 | AGTATCTT |
| Dnmt1_OT1_EF1 $\alpha$<br>_SplitPE1024_eye5 | S6 | Dnmt1_off_ta<br>rget1 | Dnmt1-OT-P5.fq.gz<br>(SRR14885693) | PRJNA739877 | AGTATCTT |
| Dnmt1_OT1_CMV_non_guide<br>_eye1            | S6 | Dnmt1_off_ta<br>rget1 | Dnmt1-OT-P6.fq.gz<br>(SRR14885692) | PRJNA739877 | TGCCACCA |
| Dnmt1_OT1_CMV_non_guide<br>_eye2            | S6 | Dnmt1_off_ta<br>rget1 | Dnmt1-OT-P7.fq.gz<br>(SRR14885691) | PRJNA739877 | TGCCACCA |
| Dnmt1_OT1_CMV_non_guide<br>_eye3            | S6 | Dnmt1_off_ta<br>rget1 | Dnmt1-OT-P8.fq.gz<br>(SRR14885690) | PRJNA739877 | TGCCACCA |
| Dnmt1_OT1_CMV_non_guide<br>_eye4            | S6 | Dnmt1_off_ta<br>rget1 | Dnmt1-OT-P9.fq.gz<br>(SRR14885689) | PRJNA739877 | TGCCACCA |
| Dnmt1_OT1_CMV_SplitPE10<br>24_eye1          | S6 | Dnmt1_off_ta<br>rget1 | Dnmt1-OT-P1.fq.gz<br>(SRR14885698) | PRJNA739877 | TGCCACCA |
| Dnmt1_OT1_CMV_SplitPE10<br>24_eye2          | S6 | Dnmt1_off_ta<br>rget1 | Dnmt1-OT-P2.fq.gz<br>(SRR14885697) | PRJNA739877 | TGCCACCA |
| Dnmt1_OT1_CMV_SplitPE10<br>24_eye3          | S6 | Dnmt1_off_ta<br>rget1 | Dnmt1-OT-P3.fq.gz<br>(SRR14885695) | PRJNA739877 | TGCCACCA |
| Dnmt1_OT1_CMV_SplitPE10<br>24_eye4          | S6 | Dnmt1_off_ta<br>rget1 | Dnmt1-OT-P4.fq.gz<br>(SRR14885694) | PRJNA739877 | TGCCACCA |
| Dnmt1_OT1_CMV_SplitPE10<br>24_eye5          | S6 | Dnmt1_off_ta<br>rget1 | Dnmt1-OT-P5.fq.gz<br>(SRR14885693) | PRJNA739877 | TGCCACCA |
| Dnmt1_OT2_EF1 $\alpha$<br>_non_guide_eye1   | S6 | Dnmt1_off_ta<br>rget2 | Dnmt1-OT-P6.fq.gz<br>(SRR14885692) | PRJNA739877 | GACGCTCC |
| Dnmt1_OT2_EF1 $\alpha$<br>_non_guide_eye2   | S6 | Dnmt1_off_ta<br>rget2 | Dnmt1-OT-P7.fq.gz<br>(SRR14885691) | PRJNA739877 | GACGCTCC |

|                                     |    |                       |                                    |             |          |
|-------------------------------------|----|-----------------------|------------------------------------|-------------|----------|
| Dnmt1_OT2_EF1α<br>_non_guide_eye3   | S6 | Dnmt1_off_ta<br>rget2 | Dnmt1-OT-P8.fq.gz<br>(SRR14885690) | PRJNA739877 | GACGCTCC |
| Dnmt1_OT2_EF1α<br>_non_guide_eye4   | S6 | Dnmt1_off_ta<br>rget2 | Dnmt1-OT-P9.fq.gz<br>(SRR14885689) | PRJNA739877 | GACGCTCC |
| Dnmt1_OT2_EF1α<br>_SplitPE1024_eye1 | S6 | Dnmt1_off_ta<br>rget2 | Dnmt1-OT-P1.fq.gz<br>(SRR14885698) | PRJNA739877 | GACGCTCC |
| Dnmt1_OT2_EF1α<br>_SplitPE1024_eye2 | S6 | Dnmt1_off_ta<br>rget2 | Dnmt1-OT-P2.fq.gz<br>(SRR14885697) | PRJNA739877 | GACGCTCC |
| Dnmt1_OT2_EF1α<br>_SplitPE1024_eye3 | S6 | Dnmt1_off_ta<br>rget2 | Dnmt1-OT-P3.fq.gz<br>(SRR14885695) | PRJNA739877 | GACGCTCC |
| Dnmt1_OT2_EF1α<br>_SplitPE1024_eye4 | S6 | Dnmt1_off_ta<br>rget2 | Dnmt1-OT-P4.fq.gz<br>(SRR14885694) | PRJNA739877 | GACGCTCC |
| Dnmt1_OT2_EF1α<br>_SplitPE1024_eye5 | S6 | Dnmt1_off_ta<br>rget2 | Dnmt1-OT-P5.fq.gz<br>(SRR14885693) | PRJNA739877 | GACGCTCC |
| Dnmt1_OT2_CMV_non_guide<br>_eye1    | S6 | Dnmt1_off_ta<br>rget2 | Dnmt1-OT-P6.fq.gz<br>(SRR14885692) | PRJNA739877 | CTCTGCCT |
| Dnmt1_OT2_CMV_non_guide<br>_eye2    | S6 | Dnmt1_off_ta<br>rget2 | Dnmt1-OT-P7.fq.gz<br>(SRR14885691) | PRJNA739877 | CTCTGCCT |
| Dnmt1_OT2_CMV_non_guide<br>_eye3    | S6 | Dnmt1_off_ta<br>rget2 | Dnmt1-OT-P8.fq.gz<br>(SRR14885690) | PRJNA739877 | CTCTGCCT |
| Dnmt1_OT2_CMV_non_guide<br>_eye4    | S6 | Dnmt1_off_ta<br>rget2 | Dnmt1-OT-P9.fq.gz<br>(SRR14885689) | PRJNA739877 | CTCTGCCT |
| Dnmt1_OT2_CMV_SplitPE10<br>24_eye1  | S6 | Dnmt1_off_ta<br>rget2 | Dnmt1-OT-P1.fq.gz<br>(SRR14885698) | PRJNA739877 | CTCTGCCT |
| Dnmt1_OT2_CMV_SplitPE10<br>24_eye2  | S6 | Dnmt1_off_ta<br>rget2 | Dnmt1-OT-P2.fq.gz<br>(SRR14885697) | PRJNA739877 | CTCTGCCT |
| Dnmt1_OT2_CMV_SplitPE10<br>24_eye3  | S6 | Dnmt1_off_ta<br>rget2 | Dnmt1-OT-P3.fq.gz<br>(SRR14885695) | PRJNA739877 | CTCTGCCT |
| Dnmt1_OT2_CMV_SplitPE10<br>24_eye4  | S6 | Dnmt1_off_ta<br>rget2 | Dnmt1-OT-P4.fq.gz<br>(SRR14885694) | PRJNA739877 | CTCTGCCT |
| Dnmt1_OT2_CMV_SplitPE10<br>24_eye5  | S6 | Dnmt1_off_ta<br>rget2 | Dnmt1-OT-P5.fq.gz<br>(SRR14885693) | PRJNA739877 | CTCTGCCT |
| Dnmt1_OT3_EF1α<br>_non_guide_eye1   | S6 | Dnmt1_off_ta<br>rget3 | Dnmt1-OT-P6.fq.gz<br>(SRR14885692) | PRJNA739877 | CATGCCAT |
| Dnmt1_OT3_EF1α<br>_non_guide_eye2   | S6 | Dnmt1_off_ta<br>rget3 | Dnmt1-OT-P7.fq.gz<br>(SRR14885691) | PRJNA739877 | CATGCCAT |
| Dnmt1_OT3_EF1α<br>_non_guide_eye3   | S6 | Dnmt1_off_ta<br>rget3 | Dnmt1-OT-P8.fq.gz<br>(SRR14885690) | PRJNA739877 | CATGCCAT |
| Dnmt1_OT3_EF1α<br>_non_guide_eye4   | S6 | Dnmt1_off_ta<br>rget3 | Dnmt1-OT-P9.fq.gz<br>(SRR14885689) | PRJNA739877 | CATGCCAT |
| Dnmt1_OT3_EF1α<br>_SplitPE1024_eye1 | S6 | Dnmt1_off_ta<br>rget3 | Dnmt1-OT-P1.fq.gz<br>(SRR14885698) | PRJNA739877 | CATGCCAT |
| Dnmt1_OT3_EF1α<br>_SplitPE1024_eye2 | S6 | Dnmt1_off_ta<br>rget3 | Dnmt1-OT-P2.fq.gz<br>(SRR14885697) | PRJNA739877 | CATGCCAT |
| Dnmt1_OT3_EF1α<br>_SplitPE1024_eye3 | S6 | Dnmt1_off_ta<br>rget3 | Dnmt1-OT-P3.fq.gz<br>(SRR14885695) | PRJNA739877 | CATGCCAT |
| Dnmt1_OT3_EF1α<br>_SplitPE1024_eye4 | S6 | Dnmt1_off_ta<br>rget3 | Dnmt1-OT-P4.fq.gz<br>(SRR14885694) | PRJNA739877 | CATGCCAT |
| Dnmt1_OT3_EF1α<br>_SplitPE1024_eye5 | S6 | Dnmt1_off_ta<br>rget3 | Dnmt1-OT-P5.fq.gz<br>(SRR14885693) | PRJNA739877 | CATGCCAT |
| Dnmt1_OT3_CMV_non_guide<br>_eye1    | S6 | Dnmt1_off_ta<br>rget3 | Dnmt1-OT-P6.fq.gz<br>(SRR14885692) | PRJNA739877 | TCTCATTC |
| Dnmt1_OT3_CMV_non_guide<br>_eye2    | S6 | Dnmt1_off_ta<br>rget3 | Dnmt1-OT-P7.fq.gz<br>(SRR14885691) | PRJNA739877 | TCTCATTC |
| Dnmt1_OT3_CMV_non_guide<br>_eye3    | S6 | Dnmt1_off_ta<br>rget3 | Dnmt1-OT-P8.fq.gz<br>(SRR14885690) | PRJNA739877 | TCTCATTC |
| Dnmt1_OT3_CMV_non_guide<br>_eye4    | S6 | Dnmt1_off_ta<br>rget3 | Dnmt1-OT-P9.fq.gz<br>(SRR14885689) | PRJNA739877 | TCTCATTC |

|                                     |    |                       |                                    |             |          |
|-------------------------------------|----|-----------------------|------------------------------------|-------------|----------|
| Dnmt1_OT3_CMV_SplitPE10<br>24_eye1  | S6 | Dnmt1_off_ta<br>rget3 | Dnmt1-OT-P1.fq.gz<br>(SRR14885698) | PRJNA739877 | TCTCATTC |
| Dnmt1_OT3_CMV_SplitPE10<br>24_eye2  | S6 | Dnmt1_off_ta<br>rget3 | Dnmt1-OT-P2.fq.gz<br>(SRR14885697) | PRJNA739877 | TCTCATTC |
| Dnmt1_OT3_CMV_SplitPE10<br>24_eye3  | S6 | Dnmt1_off_ta<br>rget3 | Dnmt1-OT-P3.fq.gz<br>(SRR14885695) | PRJNA739877 | TCTCATTC |
| Dnmt1_OT3_CMV_SplitPE10<br>24_eye4  | S6 | Dnmt1_off_ta<br>rget3 | Dnmt1-OT-P4.fq.gz<br>(SRR14885694) | PRJNA739877 | TCTCATTC |
| Dnmt1_OT3_CMV_SplitPE10<br>24_eye5  | S6 | Dnmt1_off_ta<br>rget3 | Dnmt1-OT-P5.fq.gz<br>(SRR14885693) | PRJNA739877 | TCTCATTC |
| Dnmt1_OT4_EF1α<br>_non_guide_eye1   | S6 | Dnmt1_off_ta<br>rget4 | Dnmt1-OT-P6.fq.gz<br>(SRR14885692) | PRJNA739877 | TGCATTGC |
| Dnmt1_OT4_EF1α<br>_non_guide_eye2   | S6 | Dnmt1_off_ta<br>rget4 | Dnmt1-OT-P7.fq.gz<br>(SRR14885691) | PRJNA739877 | TGCATTGC |
| Dnmt1_OT4_EF1α<br>_non_guide_eye3   | S6 | Dnmt1_off_ta<br>rget4 | Dnmt1-OT-P8.fq.gz<br>(SRR14885690) | PRJNA739877 | TGCATTGC |
| Dnmt1_OT4_EF1α<br>_non_guide_eye4   | S6 | Dnmt1_off_ta<br>rget4 | Dnmt1-OT-P9.fq.gz<br>(SRR14885689) | PRJNA739877 | TGCATTGC |
| Dnmt1_OT4_EF1α<br>_SplitPE1024_eye1 | S6 | Dnmt1_off_ta<br>rget4 | Dnmt1-OT-P1.fq.gz<br>(SRR14885698) | PRJNA739877 | TGCATTGC |
| Dnmt1_OT4_EF1α<br>_SplitPE1024_eye2 | S6 | Dnmt1_off_ta<br>rget4 | Dnmt1-OT-P2.fq.gz<br>(SRR14885697) | PRJNA739877 | TGCATTGC |
| Dnmt1_OT4_EF1α<br>_SplitPE1024_eye3 | S6 | Dnmt1_off_ta<br>rget4 | Dnmt1-OT-P3.fq.gz<br>(SRR14885695) | PRJNA739877 | TGCATTGC |
| Dnmt1_OT4_EF1α<br>_SplitPE1024_eye4 | S6 | Dnmt1_off_ta<br>rget4 | Dnmt1-OT-P4.fq.gz<br>(SRR14885694) | PRJNA739877 | TGCATTGC |
| Dnmt1_OT4_EF1α<br>_SplitPE1024_eye5 | S6 | Dnmt1_off_ta<br>rget4 | Dnmt1-OT-P5.fq.gz<br>(SRR14885693) | PRJNA739877 | TGCATTGC |
| Dnmt1_OT4_CMV_non_guide<br>_eye1    | S6 | Dnmt1_off_ta<br>rget4 | Dnmt1-OT-P6.fq.gz<br>(SRR14885692) | PRJNA739877 | ACGCCGCA |
| Dnmt1_OT4_CMV_non_guide<br>_eye2    | S6 | Dnmt1_off_ta<br>rget4 | Dnmt1-OT-P7.fq.gz<br>(SRR14885691) | PRJNA739877 | ACGCCGCA |
| Dnmt1_OT4_CMV_non_guide<br>_eye3    | S6 | Dnmt1_off_ta<br>rget4 | Dnmt1-OT-P8.fq.gz<br>(SRR14885690) | PRJNA739877 | ACGCCGCA |
| Dnmt1_OT4_CMV_non_guide<br>_eye4    | S6 | Dnmt1_off_ta<br>rget4 | Dnmt1-OT-P9.fq.gz<br>(SRR14885689) | PRJNA739877 | ACGCCGCA |
| Dnmt1_OT4_CMV_SplitPE10<br>24_eye1  | S6 | Dnmt1_off_ta<br>rget4 | Dnmt1-OT-P1.fq.gz<br>(SRR14885698) | PRJNA739877 | ACGCCGCA |
| Dnmt1_OT4_CMV_SplitPE10<br>24_eye2  | S6 | Dnmt1_off_ta<br>rget4 | Dnmt1-OT-P2.fq.gz<br>(SRR14885697) | PRJNA739877 | ACGCCGCA |
| Dnmt1_OT4_CMV_SplitPE10<br>24_eye3  | S6 | Dnmt1_off_ta<br>rget4 | Dnmt1-OT-P3.fq.gz<br>(SRR14885695) | PRJNA739877 | ACGCCGCA |
| Dnmt1_OT4_CMV_SplitPE10<br>24_eye4  | S6 | Dnmt1_off_ta<br>rget4 | Dnmt1-OT-P4.fq.gz<br>(SRR14885694) | PRJNA739877 | ACGCCGCA |
| Dnmt1_OT4_CMV_SplitPE10<br>24_eye5  | S6 | Dnmt1_off_ta<br>rget4 | Dnmt1-OT-P5.fq.gz<br>(SRR14885693) | PRJNA739877 | ACGCCGCA |
| Dnmt1_OT5_EF1α<br>_non_guide_eye1   | S6 | Dnmt1_off_ta<br>rget5 | Dnmt1-OT-P6.fq.gz<br>(SRR14885692) | PRJNA739877 | GCCAAGGT |
| Dnmt1_OT5_EF1α<br>_non_guide_eye2   | S6 | Dnmt1_off_ta<br>rget5 | Dnmt1-OT-P7.fq.gz<br>(SRR14885691) | PRJNA739877 | GCCAAGGT |
| Dnmt1_OT5_EF1α<br>_non_guide_eye3   | S6 | Dnmt1_off_ta<br>rget5 | Dnmt1-OT-P8.fq.gz<br>(SRR14885690) | PRJNA739877 | GCCAAGGT |
| Dnmt1_OT5_EF1α<br>_non_guide_eye4   | S6 | Dnmt1_off_ta<br>rget5 | Dnmt1-OT-P9.fq.gz<br>(SRR14885689) | PRJNA739877 | GCCAAGGT |
| Dnmt1_OT5_EF1α<br>_SplitPE1024_eye1 | S6 | Dnmt1_off_ta<br>rget5 | Dnmt1-OT-P1.fq.gz<br>(SRR14885698) | PRJNA739877 | GCCAAGGT |
| Dnmt1_OT5_EF1α<br>_SplitPE1024_eye2 | S6 | Dnmt1_off_ta<br>rget5 | Dnmt1-OT-P2.fq.gz<br>(SRR14885697) | PRJNA739877 | GCCAAGGT |

|                                 |    |                       |                                    |             |          |
|---------------------------------|----|-----------------------|------------------------------------|-------------|----------|
| Dnmt1_OT5_EF1α_SplitPE1024_eye3 | S6 | Dnmt1_off_ta<br>rget5 | Dnmt1-OT-P3.fq.gz<br>(SRR14885695) | PRJNA739877 | GCCAAGGT |
| Dnmt1_OT5_EF1α_SplitPE1024_eye4 | S6 | Dnmt1_off_ta<br>rget5 | Dnmt1-OT-P4.fq.gz<br>(SRR14885694) | PRJNA739877 | GCCAAGGT |
| Dnmt1_OT5_EF1α_SplitPE1024_eye5 | S6 | Dnmt1_off_ta<br>rget5 | Dnmt1-OT-P5.fq.gz<br>(SRR14885693) | PRJNA739877 | GCCAAGGT |
| Dnmt1_OT5_CMV_non_guide_eye1    | S6 | Dnmt1_off_ta<br>rget5 | Dnmt1-OT-P6.fq.gz<br>(SRR14885692) | PRJNA739877 | GATAGATC |
| Dnmt1_OT5_CMV_non_guide_eye2    | S6 | Dnmt1_off_ta<br>rget5 | Dnmt1-OT-P7.fq.gz<br>(SRR14885691) | PRJNA739877 | GATAGATC |
| Dnmt1_OT5_CMV_non_guide_eye3    | S6 | Dnmt1_off_ta<br>rget5 | Dnmt1-OT-P8.fq.gz<br>(SRR14885690) | PRJNA739877 | GATAGATC |
| Dnmt1_OT5_CMV_non_guide_eye4    | S6 | Dnmt1_off_ta<br>rget5 | Dnmt1-OT-P9.fq.gz<br>(SRR14885689) | PRJNA739877 | GATAGATC |
| Dnmt1_OT5_CMV_SplitPE1024_eye1  | S6 | Dnmt1_off_ta<br>rget5 | Dnmt1-OT-P1.fq.gz<br>(SRR14885698) | PRJNA739877 | GATAGATC |
| Dnmt1_OT5_CMV_SplitPE1024_eye2  | S6 | Dnmt1_off_ta<br>rget5 | Dnmt1-OT-P2.fq.gz<br>(SRR14885697) | PRJNA739877 | GATAGATC |
| Dnmt1_OT5_CMV_SplitPE1024_eye3  | S6 | Dnmt1_off_ta<br>rget5 | Dnmt1-OT-P3.fq.gz<br>(SRR14885695) | PRJNA739877 | GATAGATC |
| Dnmt1_OT5_CMV_SplitPE1024_eye4  | S6 | Dnmt1_off_ta<br>rget5 | Dnmt1-OT-P4.fq.gz<br>(SRR14885694) | PRJNA739877 | GATAGATC |
| Dnmt1_OT5_CMV_SplitPE1024_eye5  | S6 | Dnmt1_off_ta<br>rget5 | Dnmt1-OT-P5.fq.gz<br>(SRR14885693) | PRJNA739877 | GATAGATC |
| Dnmt1_OT6_EF1α_non_guide_eye1   | S6 | Dnmt1_off_ta<br>rget6 | Dnmt1-OT-P6.fq.gz<br>(SRR14885692) | PRJNA739877 | CGAGATAT |
| Dnmt1_OT6_EF1α_non_guide_eye2   | S6 | Dnmt1_off_ta<br>rget6 | Dnmt1-OT-P7.fq.gz<br>(SRR14885691) | PRJNA739877 | CGAGATAT |
| Dnmt1_OT6_EF1α_non_guide_eye3   | S6 | Dnmt1_off_ta<br>rget6 | Dnmt1-OT-P8.fq.gz<br>(SRR14885690) | PRJNA739877 | CGAGATAT |
| Dnmt1_OT6_EF1α_non_guide_eye4   | S6 | Dnmt1_off_ta<br>rget6 | Dnmt1-OT-P9.fq.gz<br>(SRR14885689) | PRJNA739877 | CGAGATAT |
| Dnmt1_OT6_EF1α_SplitPE1024_eye1 | S6 | Dnmt1_off_ta<br>rget6 | Dnmt1-OT-P1.fq.gz<br>(SRR14885698) | PRJNA739877 | CGAGATAT |
| Dnmt1_OT6_EF1α_SplitPE1024_eye2 | S6 | Dnmt1_off_ta<br>rget6 | Dnmt1-OT-P2.fq.gz<br>(SRR14885697) | PRJNA739877 | CGAGATAT |
| Dnmt1_OT6_EF1α_SplitPE1024_eye3 | S6 | Dnmt1_off_ta<br>rget6 | Dnmt1-OT-P3.fq.gz<br>(SRR14885695) | PRJNA739877 | CGAGATAT |
| Dnmt1_OT6_EF1α_SplitPE1024_eye4 | S6 | Dnmt1_off_ta<br>rget6 | Dnmt1-OT-P4.fq.gz<br>(SRR14885694) | PRJNA739877 | CGAGATAT |
| Dnmt1_OT6_EF1α_SplitPE1024_eye5 | S6 | Dnmt1_off_ta<br>rget6 | Dnmt1-OT-P5.fq.gz<br>(SRR14885693) | PRJNA739877 | CGAGATAT |
| Dnmt1_OT6_CMV_non_guide_eye1    | S6 | Dnmt1_off_ta<br>rget6 | Dnmt1-OT-P6.fq.gz<br>(SRR14885692) | PRJNA739877 | AGCGAGCT |
| Dnmt1_OT6_CMV_non_guide_eye2    | S6 | Dnmt1_off_ta<br>rget6 | Dnmt1-OT-P7.fq.gz<br>(SRR14885691) | PRJNA739877 | AGCGAGCT |
| Dnmt1_OT6_CMV_non_guide_eye3    | S6 | Dnmt1_off_ta<br>rget6 | Dnmt1-OT-P8.fq.gz<br>(SRR14885690) | PRJNA739877 | AGCGAGCT |
| Dnmt1_OT6_CMV_non_guide_eye4    | S6 | Dnmt1_off_ta<br>rget6 | Dnmt1-OT-P9.fq.gz<br>(SRR14885689) | PRJNA739877 | AGCGAGCT |
| Dnmt1_OT6_CMV_SplitPE1024_eye1  | S6 | Dnmt1_off_ta<br>rget6 | Dnmt1-OT-P1.fq.gz<br>(SRR14885698) | PRJNA739877 | AGCGAGCT |
| Dnmt1_OT6_CMV_SplitPE1024_eye2  | S6 | Dnmt1_off_ta<br>rget6 | Dnmt1-OT-P2.fq.gz<br>(SRR14885697) | PRJNA739877 | AGCGAGCT |
| Dnmt1_OT6_CMV_SplitPE1024_eye3  | S6 | Dnmt1_off_ta<br>rget6 | Dnmt1-OT-P3.fq.gz<br>(SRR14885695) | PRJNA739877 | AGCGAGCT |
| Dnmt1_OT6_CMV_SplitPE1024_eye4  | S6 | Dnmt1_off_ta<br>rget6 | Dnmt1-OT-P4.fq.gz<br>(SRR14885694) | PRJNA739877 | AGCGAGCT |

|                                          |    |                   |                                 |             |          |
|------------------------------------------|----|-------------------|---------------------------------|-------------|----------|
| Dnmt1_OT6_CMV_SplitPE1024_eye5           | S6 | Dnmt1_off_target6 | Dnmt1-OT-P5.fq.gz (SRR14885693) | PRJNA739877 | AGCGAGCT |
| Dnmt1_OT7_EF1 $\alpha$ _non_guide_eye1   | S6 | Dnmt1_off_target7 | Dnmt1-OT-P6.fq.gz (SRR14885692) | PRJNA739877 | TAGAGCGC |
| Dnmt1_OT7_EF1 $\alpha$ _non_guide_eye2   | S6 | Dnmt1_off_target7 | Dnmt1-OT-P7.fq.gz (SRR14885691) | PRJNA739877 | TAGAGCGC |
| Dnmt1_OT7_EF1 $\alpha$ _non_guide_eye3   | S6 | Dnmt1_off_target7 | Dnmt1-OT-P8.fq.gz (SRR14885690) | PRJNA739877 | TAGAGCGC |
| Dnmt1_OT7_EF1 $\alpha$ _non_guide_eye4   | S6 | Dnmt1_off_target7 | Dnmt1-OT-P9.fq.gz (SRR14885689) | PRJNA739877 | TAGAGCGC |
| Dnmt1_OT7_EF1 $\alpha$ _SplitPE1024_eye1 | S6 | Dnmt1_off_target7 | Dnmt1-OT-P1.fq.gz (SRR14885698) | PRJNA739877 | TAGAGCGC |
| Dnmt1_OT7_EF1 $\alpha$ _SplitPE1024_eye2 | S6 | Dnmt1_off_target7 | Dnmt1-OT-P2.fq.gz (SRR14885697) | PRJNA739877 | TAGAGCGC |
| Dnmt1_OT7_EF1 $\alpha$ _SplitPE1024_eye3 | S6 | Dnmt1_off_target7 | Dnmt1-OT-P3.fq.gz (SRR14885695) | PRJNA739877 | TAGAGCGC |
| Dnmt1_OT7_EF1 $\alpha$ _SplitPE1024_eye4 | S6 | Dnmt1_off_target7 | Dnmt1-OT-P4.fq.gz (SRR14885694) | PRJNA739877 | TAGAGCGC |
| Dnmt1_OT7_EF1 $\alpha$ _SplitPE1024_eye5 | S6 | Dnmt1_off_target7 | Dnmt1-OT-P5.fq.gz (SRR14885693) | PRJNA739877 | TAGAGCGC |
| Dnmt1_OT7_CMV_non_guide_eye1             | S6 | Dnmt1_off_target7 | Dnmt1-OT-P6.fq.gz (SRR14885692) | PRJNA739877 | CAGTTCCG |
| Dnmt1_OT7_CMV_non_guide_eye2             | S6 | Dnmt1_off_target7 | Dnmt1-OT-P7.fq.gz (SRR14885691) | PRJNA739877 | CAGTTCCG |
| Dnmt1_OT7_CMV_non_guide_eye3             | S6 | Dnmt1_off_target7 | Dnmt1-OT-P8.fq.gz (SRR14885690) | PRJNA739877 | CAGTTCCG |
| Dnmt1_OT7_CMV_non_guide_eye4             | S6 | Dnmt1_off_target7 | Dnmt1-OT-P9.fq.gz (SRR14885689) | PRJNA739877 | CAGTTCCG |
| Dnmt1_OT7_CMV_SplitPE1024_eye1           | S6 | Dnmt1_off_target7 | Dnmt1-OT-P1.fq.gz (SRR14885698) | PRJNA739877 | CAGTTCCG |
| Dnmt1_OT7_CMV_SplitPE1024_eye2           | S6 | Dnmt1_off_target7 | Dnmt1-OT-P2.fq.gz (SRR14885697) | PRJNA739877 | CAGTTCCG |
| Dnmt1_OT7_CMV_SplitPE1024_eye3           | S6 | Dnmt1_off_target7 | Dnmt1-OT-P3.fq.gz (SRR14885695) | PRJNA739877 | CAGTTCCG |
| Dnmt1_OT7_CMV_SplitPE1024_eye4           | S6 | Dnmt1_off_target7 | Dnmt1-OT-P4.fq.gz (SRR14885694) | PRJNA739877 | CAGTTCCG |
| Dnmt1_OT7_CMV_SplitPE1024_eye5           | S6 | Dnmt1_off_target7 | Dnmt1-OT-P5.fq.gz (SRR14885693) | PRJNA739877 | CAGTTCCG |
| Dnmt1_OT8_EF1 $\alpha$ _non_guide_eye1   | S6 | Dnmt1_off_target8 | Dnmt1-OT-P6.fq.gz (SRR14885692) | PRJNA739877 | GGTTCACC |
| Dnmt1_OT8_EF1 $\alpha$ _non_guide_eye2   | S6 | Dnmt1_off_target8 | Dnmt1-OT-P7.fq.gz (SRR14885691) | PRJNA739877 | GGTTCACC |
| Dnmt1_OT8_EF1 $\alpha$ _non_guide_eye3   | S6 | Dnmt1_off_target8 | Dnmt1-OT-P8.fq.gz (SRR14885690) | PRJNA739877 | GGTTCACC |
| Dnmt1_OT8_EF1 $\alpha$ _non_guide_eye4   | S6 | Dnmt1_off_target8 | Dnmt1-OT-P9.fq.gz (SRR14885689) | PRJNA739877 | GGTTCACC |
| Dnmt1_OT8_EF1 $\alpha$ _SplitPE1024_eye1 | S6 | Dnmt1_off_target8 | Dnmt1-OT-P1.fq.gz (SRR14885698) | PRJNA739877 | GGTTCACC |
| Dnmt1_OT8_EF1 $\alpha$ _SplitPE1024_eye2 | S6 | Dnmt1_off_target8 | Dnmt1-OT-P2.fq.gz (SRR14885697) | PRJNA739877 | GGTTCACC |
| Dnmt1_OT8_EF1 $\alpha$ _SplitPE1024_eye3 | S6 | Dnmt1_off_target8 | Dnmt1-OT-P3.fq.gz (SRR14885695) | PRJNA739877 | GGTTCACC |
| Dnmt1_OT8_EF1 $\alpha$ _SplitPE1024_eye4 | S6 | Dnmt1_off_target8 | Dnmt1-OT-P4.fq.gz (SRR14885694) | PRJNA739877 | GGTTCACC |
| Dnmt1_OT8_EF1 $\alpha$ _SplitPE1024_eye5 | S6 | Dnmt1_off_target8 | Dnmt1-OT-P5.fq.gz (SRR14885693) | PRJNA739877 | GGTTCACC |
| Dnmt1_OT8_CMV_non_guide_eye1             | S6 | Dnmt1_off_target8 | Dnmt1-OT-P6.fq.gz (SRR14885692) | PRJNA739877 | CTAGGCAA |

|                                 |    |                   |                                    |             |          |
|---------------------------------|----|-------------------|------------------------------------|-------------|----------|
| Dnmt1_OT8_CMV_non_guide_eye2    | S6 | Dnmt1_off_target8 | Dnmt1-OT-P7.fq.gz<br>(SRR14885691) | PRJNA739877 | CTAGGCAA |
| Dnmt1_OT8_CMV_non_guide_eye3    | S6 | Dnmt1_off_target8 | Dnmt1-OT-P8.fq.gz<br>(SRR14885690) | PRJNA739877 | CTAGGCAA |
| Dnmt1_OT8_CMV_non_guide_eye4    | S6 | Dnmt1_off_target8 | Dnmt1-OT-P9.fq.gz<br>(SRR14885689) | PRJNA739877 | CTAGGCAA |
| Dnmt1_OT8_CMV_SplitPE10_24_eye1 | S6 | Dnmt1_off_target8 | Dnmt1-OT-P1.fq.gz<br>(SRR14885698) | PRJNA739877 | CTAGGCAA |
| Dnmt1_OT8_CMV_SplitPE10_24_eye2 | S6 | Dnmt1_off_target8 | Dnmt1-OT-P2.fq.gz<br>(SRR14885697) | PRJNA739877 | CTAGGCAA |
| Dnmt1_OT8_CMV_SplitPE10_24_eye3 | S6 | Dnmt1_off_target8 | Dnmt1-OT-P3.fq.gz<br>(SRR14885695) | PRJNA739877 | CTAGGCAA |
| Dnmt1_OT8_CMV_SplitPE10_24_eye4 | S6 | Dnmt1_off_target8 | Dnmt1-OT-P4.fq.gz<br>(SRR14885694) | PRJNA739877 | CTAGGCAA |
| Dnmt1_OT8_CMV_SplitPE10_24_eye5 | S6 | Dnmt1_off_target8 | Dnmt1-OT-P5.fq.gz<br>(SRR14885693) | PRJNA739877 | CTAGGCAA |
